# Supplementary material for: Enhanced sorption in an indium-acetylenedicarboxylate metal–organic framework with unexpected chains of cis-μ-OH-connected {InO6} octahedra
Source: Royal Society of Chemistry journal article supplement (doi:10.1039/d2dt03719j), 2022-12-14
Supplement: d2dt03719j1.pdf [file d2dt03719j1.pdf]

## Electronic Supplementary Information (ESI)

### Enhanced sorption in an indium-acetylenedicarboxylate metal-organic framework with unexpected chains of *cis*- $\mu$ -OH-connected {InO<sub>6</sub>} octahedra

Dennis Woschko, Süheyla Yilmaz, Christian Jansen, Alex Spieß, Robert Oestreich, Tobie Matemb Ma Ntep, Christoph Janiak\*

*Institut für Anorganische Chemie und Strukturchemie, Heinrich-Heine-Universität Düsseldorf, Universitätsstraße 1, 40225 Düsseldorf, Germany.*

\* Corresponding author: C. Janiak Tel.: +49 211 81 12286; fax: +49 211 81 12287.

**Emails:** [dennis.woschko@hhu.de](mailto:dennis.woschko@hhu.de), [sueheylaylmz@gmail.com](mailto:sueheylaylmz@gmail.com), [christian.jansen@hhu.de](mailto:christian.jansen@hhu.de), [alex.spieß@hhu.de](mailto:alex.spieß@hhu.de), [robert.oestreich@hhu.de](mailto:robert.oestreich@hhu.de), [tobie.matemb.ma.ntep@hhu.de](mailto:tobie.matemb.ma.ntep@hhu.de), [janiak@uni-duesseldorf.de](mailto:janiak@uni-duesseldorf.de)

**Keywords:** Metal-organic frameworks, indium, linear linker, *cis*- $\mu$ -OH-connected polyhedra, chiral space group, gas adsorption, hydrogen, heat of adsorption, vapor adsorption, volatile organic compounds (VOCs), IAST selectivity.

**The adsorption data is also supplied as separate files in AIF format as part of the ESI.**

#### Content

|                                                                                                                                   |     |
|-----------------------------------------------------------------------------------------------------------------------------------|-----|
| Section S1: Characterization of HHUD-4 and In-fum.....                                                                            | S2  |
| Section S2: CO <sub>2</sub> , CH <sub>4</sub> and H <sub>2</sub> gas sorption results and literature comparison.....              | S6  |
| Section S3: Calculations and fitting for the isosteric heat of adsorption of CO <sub>2</sub> , CH <sub>4</sub> and H <sub>2</sub> | S7  |
| Section S4: Fitting and IAST calculations for CO <sub>2</sub> /CH <sub>4</sub> mixtures .....                                     | S10 |
| Section S5: Vapor sorption experiments .....                                                                                      | S13 |
| Section S6: Fitting and IAST calculations for the vapor sorption experiments .....                                                | S17 |
| Section S7: Theoretical calculations with the HHUD-4 crystal structure data .....                                                 | S20 |
| Section S8: HHUD-4 crystal data .....                                                                                             | S22 |
| Section S9: References .....                                                                                                      | S27 |

## Section S1: Characterization of HHUD-4 and In-fum

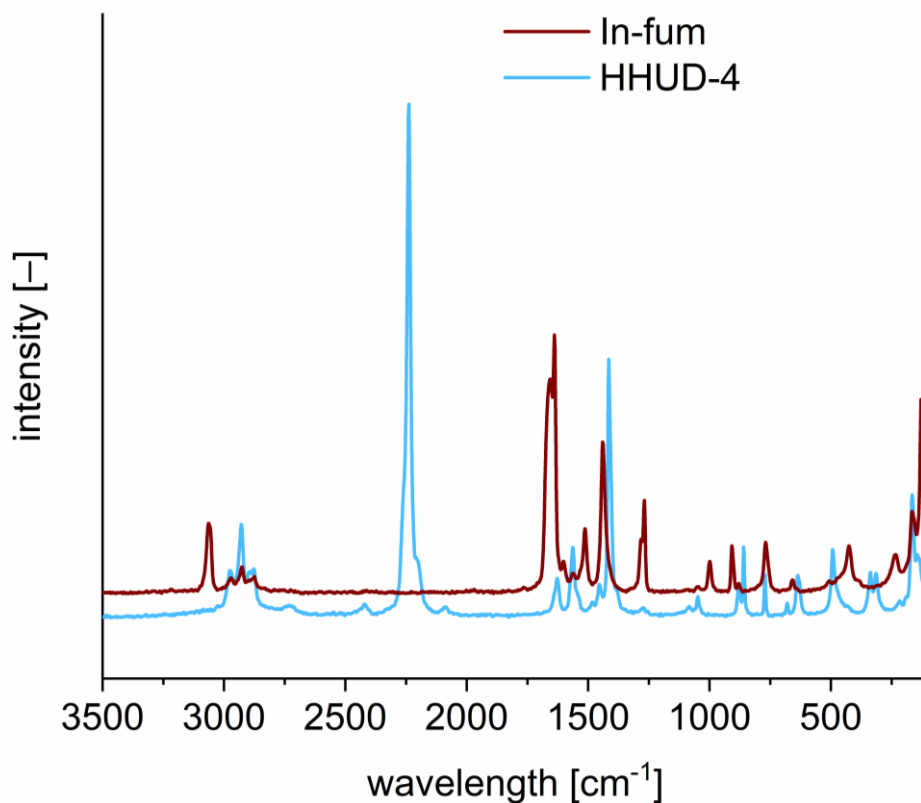

**Figure S1.** Raman spectra of HHUD-4 and In-fum in the range from 3500 to 100 cm<sup>-1</sup>.

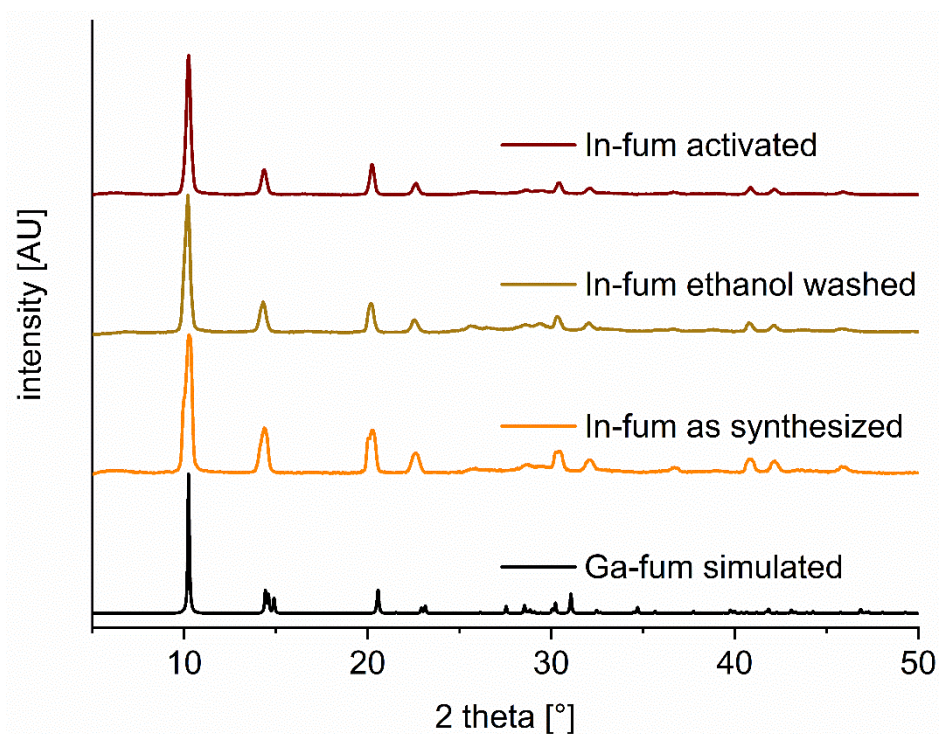

**Figure S2.** Comparison of the experimental powder X-ray diffractograms, PXRDs of In-fum (no X-ray structure available) after sequential activation steps with the simulated pattern of Ga-fum from the deposited cif file with CCDC no. 1838533.<sup>1</sup>

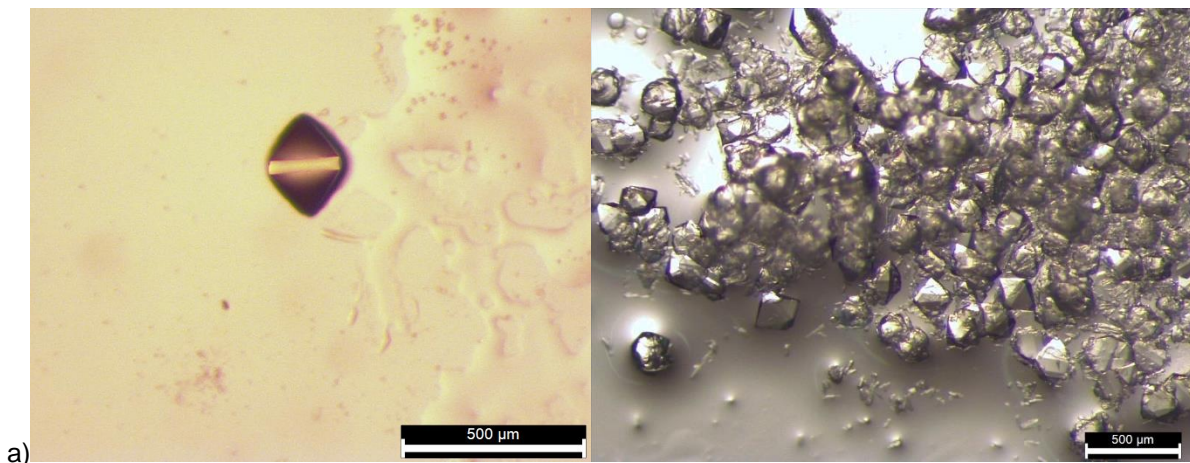

a)

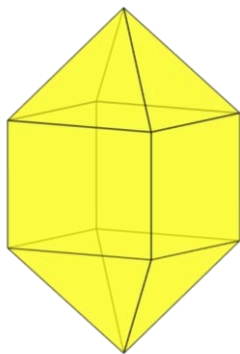

b)

**Figure S3.** a) Optical microscopy images of single crystals of HHUD-4 directly obtained from synthesis. b) The predicted crystal habit of a bicapped square prism from the Bravais, Friedel, Donnay and Harker (BFDH) algorithm embedded in MERCURY.<sup>2</sup>

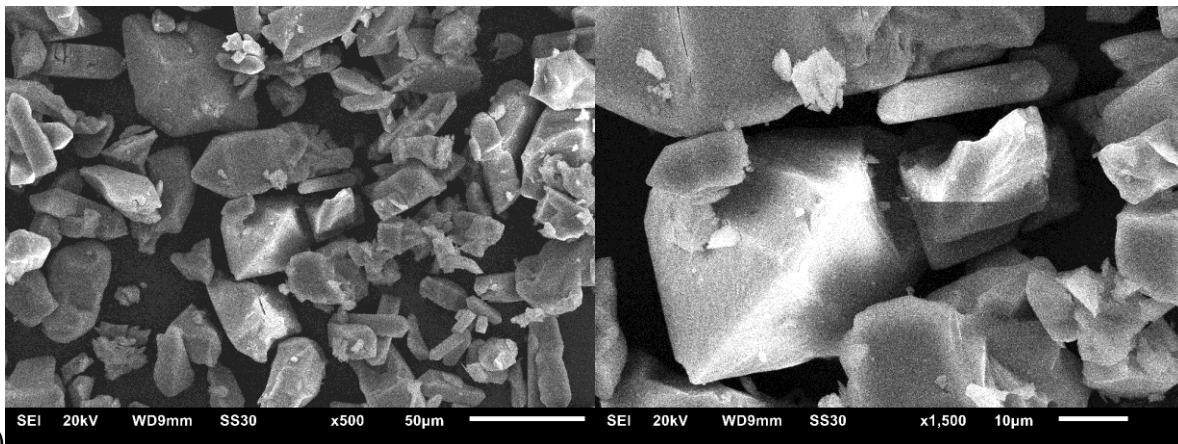

a)

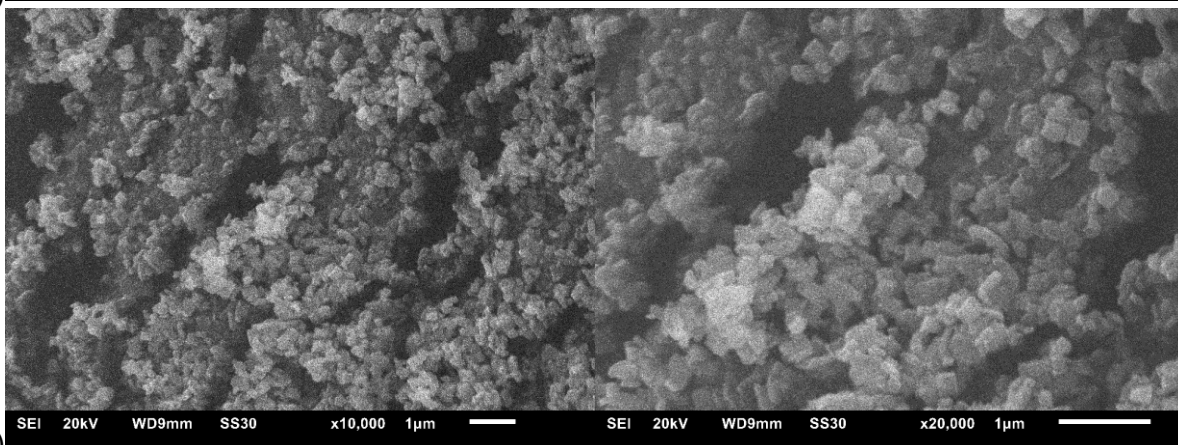

b)

**Figure S4.** SEM images of a) HHUD-4 and b) In-fum.

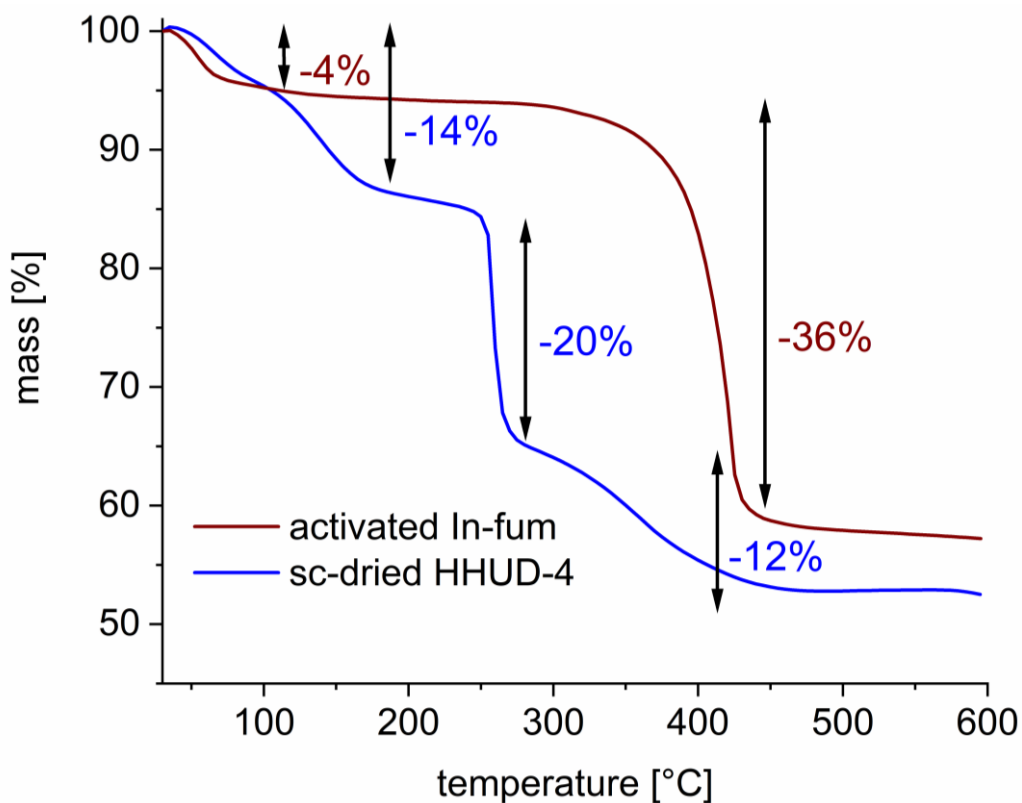

**Figure S5.** Thermogravimetric analysis of HHUD-4 and In-fum after supercritical (sc) drying or activation under vacuum at 100 °C for 3 h. TGA was carried out under nitrogen with a heating rate of 5 K min<sup>-1</sup>.

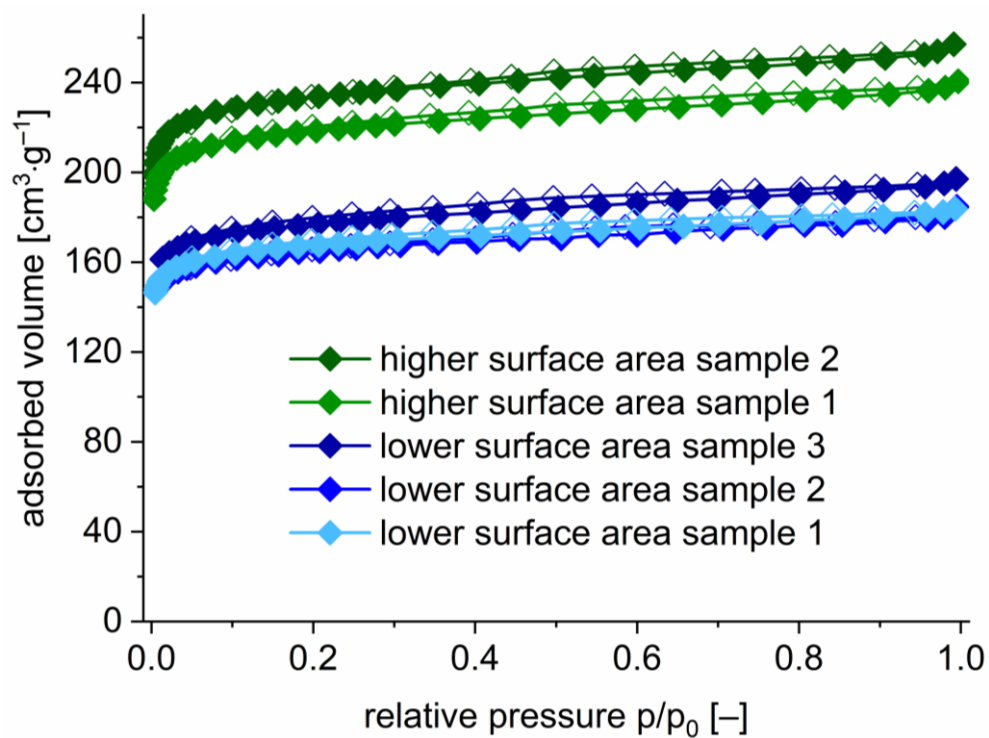

**Figure S6.** Volumetric nitrogen sorption isotherms of different samples of HHUD-4 (filled symbols for adsorption, empty symbols for desorption).

**Table S1.** BET surface areas and pore volumes of different HHUD-4 samples synthesized and washed under the same conditions.

| sample                | BET surface area             | pore volume at $p/p_0 = 0.95$ |
|-----------------------|------------------------------|-------------------------------|
|                       | $[\text{m}^2 \text{g}^{-1}]$ | $[\text{cm}^3 \text{g}^{-1}]$ |
| high surface sample 2 | 938                          | 0.391                         |
| high surface sample 1 | 878                          | 0.366                         |
| low surface sample 3  | 703                          | 0.299                         |
| low surface sample 2  | 672                          | 0.280                         |
| low surface sample 1  | 661                          | 0.277                         |

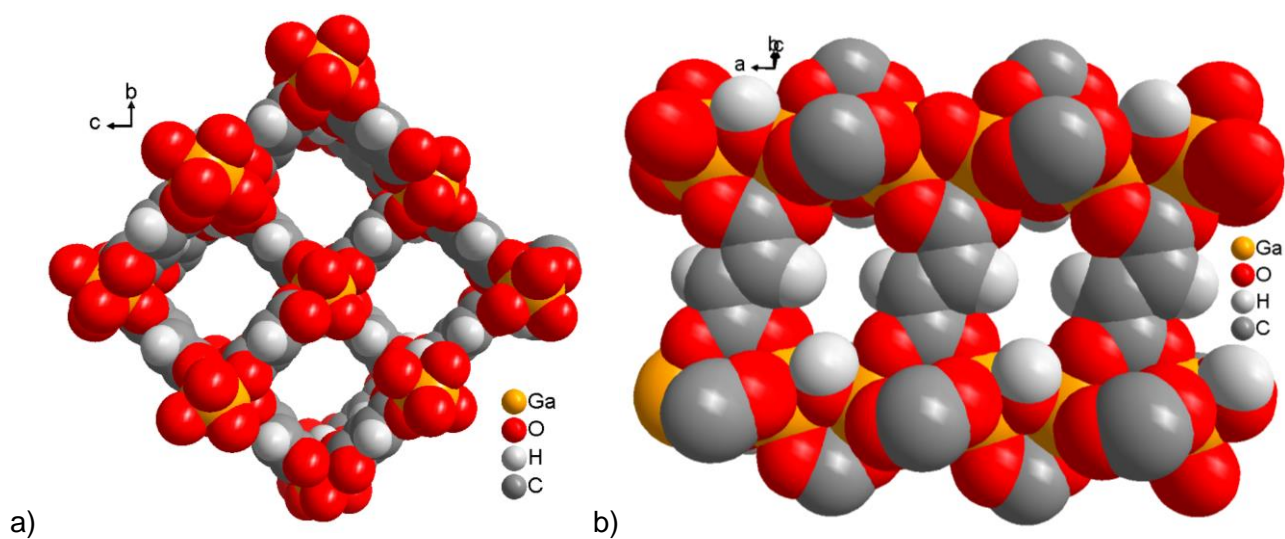

**Figure S7:** a) Square channels along the a-axis and b) smaller channels perpendicular to a in Ga-fum. Redrawn from the deposited cif file with CCDC no. 1838533.<sup>1</sup>

## Section S2: CO<sub>2</sub>, CH<sub>4</sub> and H<sub>2</sub> gas sorption results and literature comparison

**Table S2.** Summary of the CO<sub>2</sub>, CH<sub>4</sub> and H<sub>2</sub> gas uptakes at 1 bar and calculated zero coverage isosteric heat of adsorption values for HHUD-4 and In-fum.

|                                                      | HHUD-4 | In-fum |
|------------------------------------------------------|--------|--------|
| <b>CO<sub>2</sub></b>                                |        |        |
| maximum uptake at 293 K [mmol g <sup>-1</sup> ]      | 2.74   | 1.76   |
| maximum uptake at 273 K [mmol g <sup>-1</sup> ]      | 3.77   | 2.91   |
| Q <sub>st</sub> <sup>0</sup> [kJ mol <sup>-1</sup> ] | 28.7   | 17.5   |
| <b>CH<sub>4</sub></b>                                |        |        |
| maximum uptake at 293 K [mmol g <sup>-1</sup> ]      | 0.72   | 0.56   |
| maximum uptake at 273 K [mmol g <sup>-1</sup> ]      | 1.25   | 0.88   |
| Q <sub>st</sub> <sup>0</sup> [kJ mol <sup>-1</sup> ] | 26.2   | 29.8   |
| <b>H<sub>2</sub></b>                                 |        |        |
| maximum uptake at 100 K [mmol g <sup>-1</sup> ]      | 2.35   | 1.93   |
| maximum uptake at 87 K [mmol g <sup>-1</sup> ]       | 4.34   | 3.45   |
| maximum uptake at 77 K [mmol g <sup>-1</sup> ]       | 6.36   | 5.78   |
| Q <sub>st</sub> <sup>0</sup> [kJ mol <sup>-1</sup> ] | 11.4   | 8.2    |

**Table S3.** Summary of the literature reported CO<sub>2</sub>, CH<sub>4</sub> and H<sub>2</sub> uptakes at 1 bar and heat of adsorption values for various MOFs.

| MOF                                                                                                 | CO <sub>2</sub> uptake              | CO <sub>2</sub> Q <sub>st</sub> <sup>0</sup> | CH <sub>4</sub> uptake              | CH <sub>4</sub> Q <sub>st</sub> <sup>0</sup> | H <sub>2</sub> uptake              | H <sub>2</sub> Q <sub>st</sub> <sup>0</sup> |
|-----------------------------------------------------------------------------------------------------|-------------------------------------|----------------------------------------------|-------------------------------------|----------------------------------------------|------------------------------------|---------------------------------------------|
|                                                                                                     | at 293 K<br>[mmol g <sup>-1</sup> ] | [kJ mol <sup>-1</sup> ]                      | at 293 K<br>[mmol g <sup>-1</sup> ] | [kJ mol <sup>-1</sup> ]                      | at 77 K<br>[mmol g <sup>-1</sup> ] | [kJ mol <sup>-1</sup> ]                     |
| Zr-HHU-1                                                                                            | 0.9 <sup>[3]</sup>                  | 60 <sup>[3]</sup>                            | –                                   | –                                            | 4.10 <sup>[3]</sup>                | 10.3 <sup>[3]</sup>                         |
| Ce-HHU-1                                                                                            | 2.5 <sup>[4]</sup>                  | 47 <sup>[4]</sup>                            | –                                   | –                                            | –                                  | –                                           |
| Hf-HHU-1                                                                                            | 1.6 <sup>[5]</sup>                  | 39 <sup>[5]</sup>                            | –                                   | –                                            | –                                  | –                                           |
| NUS-36                                                                                              | 2.1 <sup>[6,a]</sup>                | –                                            | –                                   | –                                            | –                                  | –                                           |
| MIL-53                                                                                              | 2.11 <sup>[7]</sup>                 | 25 <sup>[8]</sup>                            | 0.57 <sup>[9]</sup>                 | 15 <sup>[9,b]</sup>                          | 1.47 <sup>[13]</sup>               | –                                           |
| CAU-10-H                                                                                            | 2.76 <sup>[7]</sup>                 | 25 <sup>[10,b]</sup>                         | 1.04 <sup>[11]</sup>                | 8 <sup>[9,b]</sup>                           | 6.42 <sup>[13]</sup>               | –                                           |
| Al-fum                                                                                              | 2.52 <sup>[7]</sup>                 | –                                            | 1.14 <sup>[9]</sup>                 | 15.9 <sup>[9]</sup>                          | 9.01 <sup>[13]</sup>               | –                                           |
| MIL-160                                                                                             | 4.22 <sup>[7]</sup>                 | 33 <sup>[12]</sup>                           | 0.84 <sup>[11]</sup>                | 18.7 <sup>[12]</sup>                         | 11.91 <sup>[13]</sup>              | –                                           |
| CAU-23                                                                                              | 3.97 <sup>[13]</sup>                | 22 <sup>[13]</sup>                           | 0.89 <sup>[13]</sup>                | 14.8 <sup>[13]</sup>                         | 10.25 <sup>[13]</sup>              | 4 <sup>[13]</sup>                           |
| SNU-15'                                                                                             | –                                   | –                                            | –                                   | –                                            | 3.66 <sup>[14,c]</sup>             | 15.1 <sup>[14]</sup>                        |
| Ni(dhtp)                                                                                            | –                                   | –                                            | –                                   | –                                            | –                                  | 12.9 <sup>[15]</sup>                        |
| Zn <sub>3</sub> (bdc) <sub>3</sub> [Cu(pyen)]<br>(DMF) <sub>5</sub> (H <sub>2</sub> O) <sub>5</sub> | –                                   | –                                            | –                                   | –                                            | –                                  | 12.3 <sup>[16]</sup>                        |

a: measured at 273 K, visually read from graph and calculated to mmol g<sup>-1</sup> with the ideal gas equation  $p \cdot v = n \cdot R \cdot T$

b: visually read from graph

c: calculated with ideal gas equation from uptake in cm<sup>3</sup> g<sup>-1</sup>

### Section S3: Calculations and fitting for the isosteric heat of adsorption of CO<sub>2</sub>, CH<sub>4</sub> and H<sub>2</sub>

Adsorption isotherms for CO<sub>2</sub>, CH<sub>4</sub> (273 and 293 K) and H<sub>2</sub> (77, 87 and 100 K) of HHUD-4 and In-fum were fitted with the Freundlich-Langmuir model. Freundlich-Langmuir fits are given in Figure S8 to Figure S11 and the fitting parameters are summarized in Table S4 and Table S5.

Freundlich-Langmuir:

$$n = \frac{a \cdot b \cdot p^c}{1 + b \cdot p^c}$$

$n$  = amount absorbed [mmol g<sup>-1</sup>]

$a$  = maximal loading [mmol g<sup>-1</sup>]

$b$  = affinity constant [bar<sup>-1</sup>]

$c$  = heterogeneity exponent

$p$  = pressure [bar]

The isosteric heat of adsorption was then calculated with the Clausius-Clapeyron equation:

$$Q_{st} = -R \left( \frac{T_2 \cdot T_1}{T_2 - T_1} \right) \ln \frac{p_2}{p_1}$$

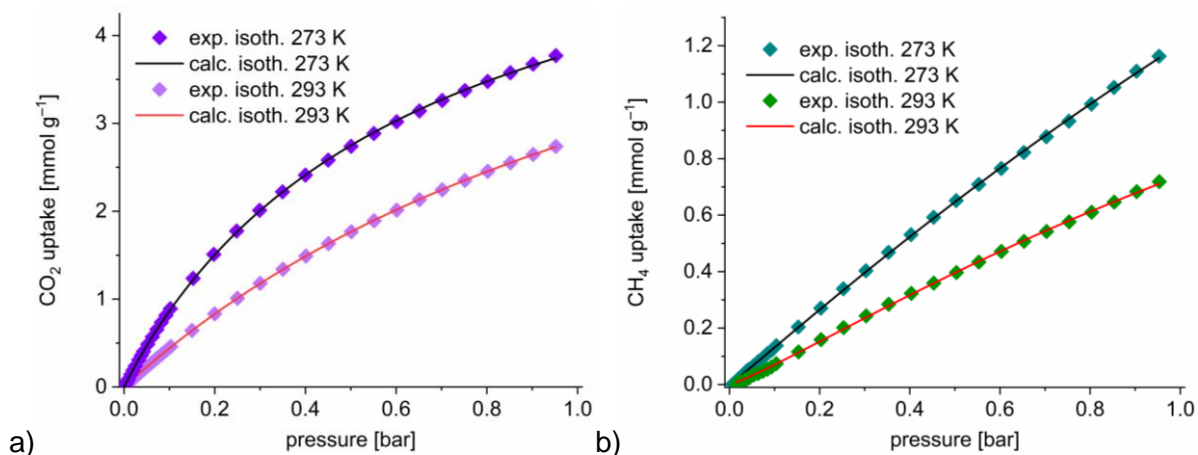

**Figure S8.** Experimental a) CO<sub>2</sub> and b) CH<sub>4</sub> adsorption isotherms of HHUD-4 with their corresponding Freundlich-Langmuir model fits at 273 and 293 K.

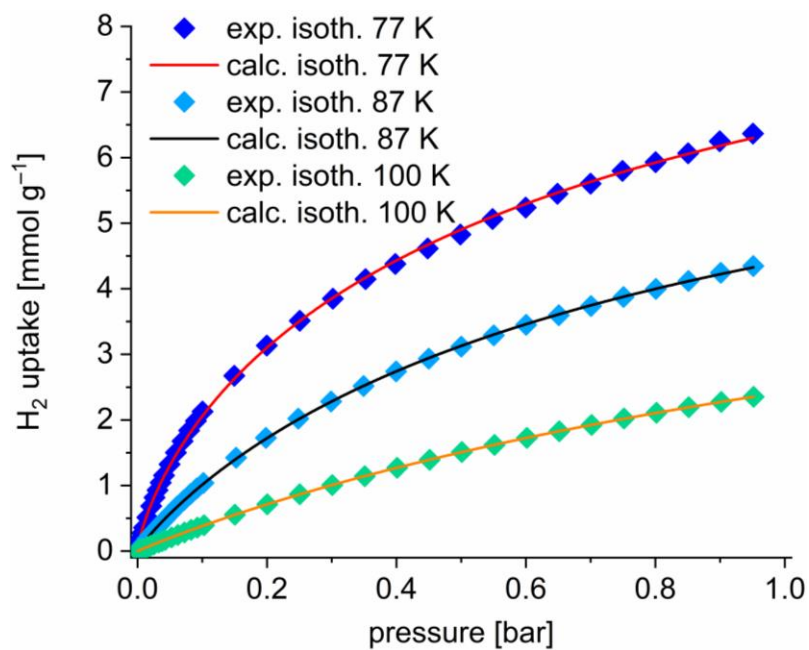

**Figure S9.** Experimental H<sub>2</sub> adsorption isotherms of HHUD-4 with their corresponding Freundlich-Langmuir model fits at 77, 87 and 100 K.

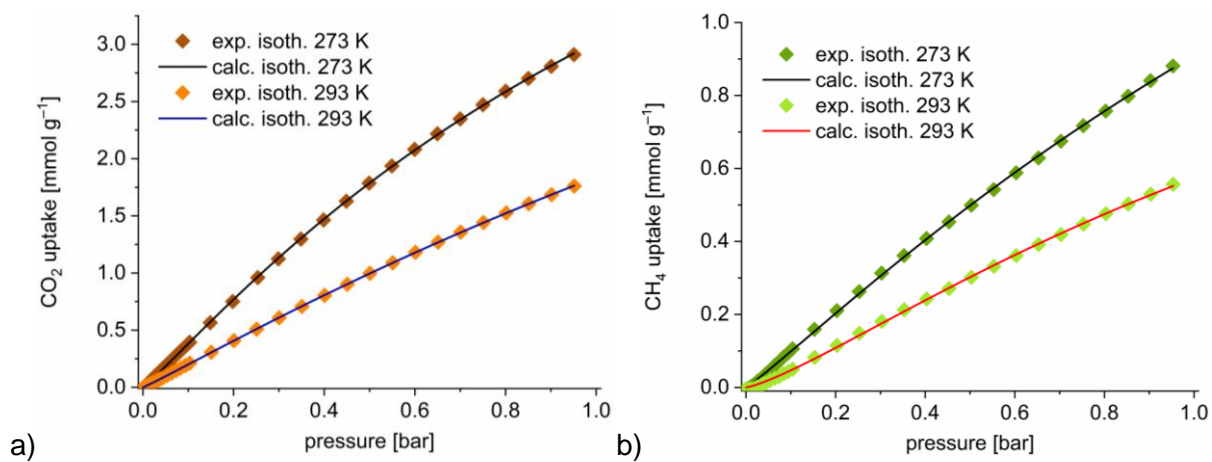

**Figure S10.** Experimental a) CO<sub>2</sub> and b) CH<sub>4</sub> adsorption isotherms of In-fum with their corresponding Freundlich-Langmuir model fits at 273 and 293 K.



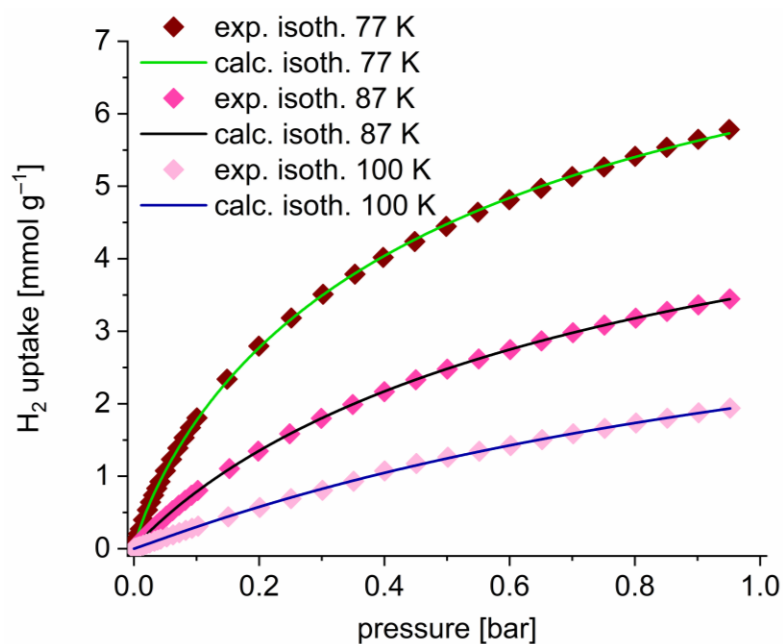

**Figure S11.** Experimental H<sub>2</sub> adsorption isotherms of In-fum with their corresponding Freundlich-Langmuir model fits at 77, 87 and 100 K.

**Table S4.** Freundlich-Langmuir fitting parameters for CO<sub>2</sub>, CH<sub>4</sub> and H<sub>2</sub> adsorption isotherms for HHUD-4.

| Gas                                                | CO <sub>2</sub> |         | CH <sub>4</sub> |         | H <sub>2</sub> |         |         |
|----------------------------------------------------|-----------------|---------|-----------------|---------|----------------|---------|---------|
| Temperature [K]                                    | 273             | 293     | 273             | 293     | 77             | 87      | 100     |
| maximal loading, <i>a</i> [mmol g <sup>-1</sup> ]* | 6.3637          | 6.8862  | 6.5495          | 2.4905  | 11.4427        | 8.2774  | 6.5725  |
| affinity constant, <i>b</i> [bar <sup>-1</sup> ]   | 1.4995          | 0.6913  | 0.2254          | 0.4223  | 1.2724         | 1.1462  | 0.5855  |
| heterogeneity exponent, <i>c</i>                   | 0.9803          | 1.0051  | 1.0418          | 1.1616  | 0.7639         | 0.9154  | 0.9766  |
| Correlation coefficient R <sup>2</sup>             | 0.99994         | 0.99998 | 0.99988         | 0.99973 | 0.99959        | 0.99994 | 0.99999 |
| Heat of adsorption [kJ mol <sup>-1</sup> ]         | 28.7            |         | 26.2            |         | 11.4           |         |         |

\*amount adsorbed at saturation, that is maximal loading for the asymptotic curvature of the adsorption isotherm

**Table S5.** Freundlich-Langmuir fitting parameters for CO<sub>2</sub>, CH<sub>4</sub> and H<sub>2</sub> adsorption isotherms for In-fum.

| Gas                                                | CO <sub>2</sub> |         | CH <sub>4</sub> |         | H <sub>2</sub> |         |         |
|----------------------------------------------------|-----------------|---------|-----------------|---------|----------------|---------|---------|
| Temperature [K]                                    | 273             | 293     | 273             | 293     | 77             | 87      | 100     |
| maximal loading, <i>a</i> [mmol g <sup>-1</sup> ]* | 7.7913          | 8.5030  | 3.4056          | 1.5839  | 9.2512         | 6.4966  | 4.6511  |
| affinity constant, <i>b</i> [bar <sup>-1</sup> ]   | 0.6337          | 0.2760  | 0.3642          | 0.5684  | 1.6997         | 1.1804  | 0.7492  |
| heterogeneity exponent, <i>c</i>                   | 1.0906          | 1.0579  | 1.0873          | 1.2708  | 0.8568         | 0.9337  | 1.0345  |
| Correlation coefficient R <sup>2</sup>             | 0.99997         | 0.99998 | 0.99968         | 0.99919 | 0.99989        | 0.99999 | 0.99984 |
| Heat of adsorption [kJ mol <sup>-1</sup> ]         | 17.5            |         | 29.8            |         | 8.2            |         |         |

\*amount adsorbed at saturation, that is maximal loading for the asymptotic curvature of the adsorption isotherm

## Section S4: Fitting and IAST calculations for CO<sub>2</sub>/CH<sub>4</sub> mixtures

The adsorption isotherms for CO<sub>2</sub> and CH<sub>4</sub> were fitted with the 3PSim software.<sup>17</sup> 3PSim is a tool to interpret and evaluate experimental adsorption data with several adsorption isotherm models, including Henry, Toth, Freundlich, LAI, SIPS, Dual-site Langmuir and DS Langmuir SIPS. The best fitting model for the CO<sub>2</sub> and CH<sub>4</sub> adsorption isotherms was the Toth model (a calculation of IAST with a Freundlich-Langmuir fit is not possible with the 3PSim software).

Toth:

$$q = q_{max} \frac{k \cdot p}{[1 + (k \cdot p)^t]^{\frac{1}{t}}}$$

$q$  = amount absorbed [mmol g<sup>-1</sup>]

$q_{max}$  = maximal loading [mmol g<sup>-1</sup>]

$k$  = Toth constant/ affinity constant [bar<sup>-1</sup>]

$t$  = heterogeneity exponent

$p$  = pressure [bar]

The IAST (ideal adsorbed solution theory) selectivity calculation was done with the “IAST with Toth” isotherm model with two components. The parameters (of both gases at a single temperature) obtained from the Toth fit (Table S6 and Table S7) were used as input, the molar fraction was set to 0.5 and the total pressure was set to 1 bar. From the resulting adsorbed fractions of CO<sub>2</sub> ( $x_1$ ) and CH<sub>4</sub> ( $x_2$ ) the selectivity was calculated with the following formula:

$$S = \frac{x_1/x_2}{y_1/y_2}$$

$y_1$  and  $y_2$  are the mole fractions of CO<sub>2</sub> and CH<sub>4</sub>, respectively.

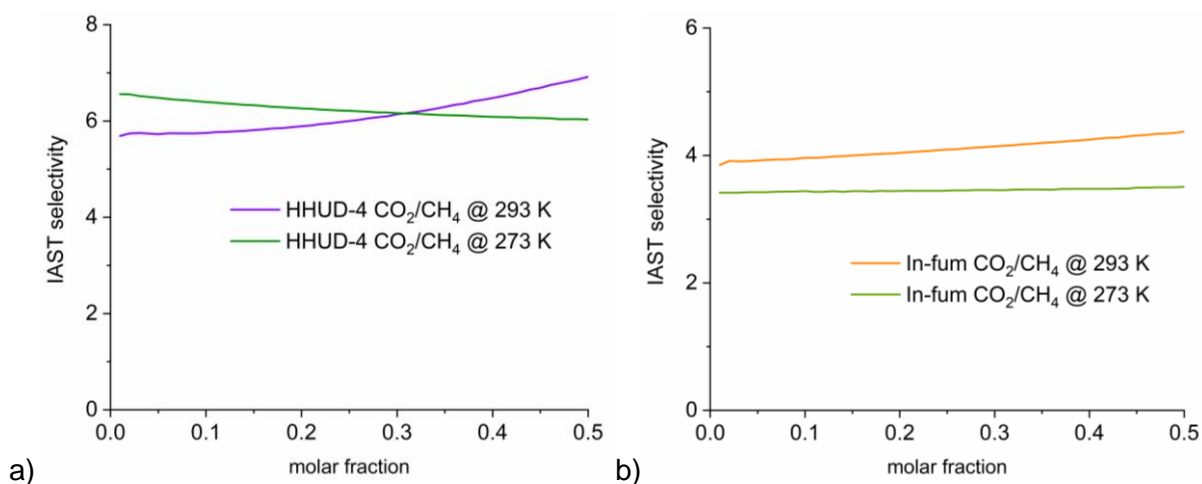

**Figure S12.** Plots of IAST selectivity of a) HHUD-4 and b) In-fum for CO<sub>2</sub>/CH<sub>4</sub> mixtures at 273 and 293 K.

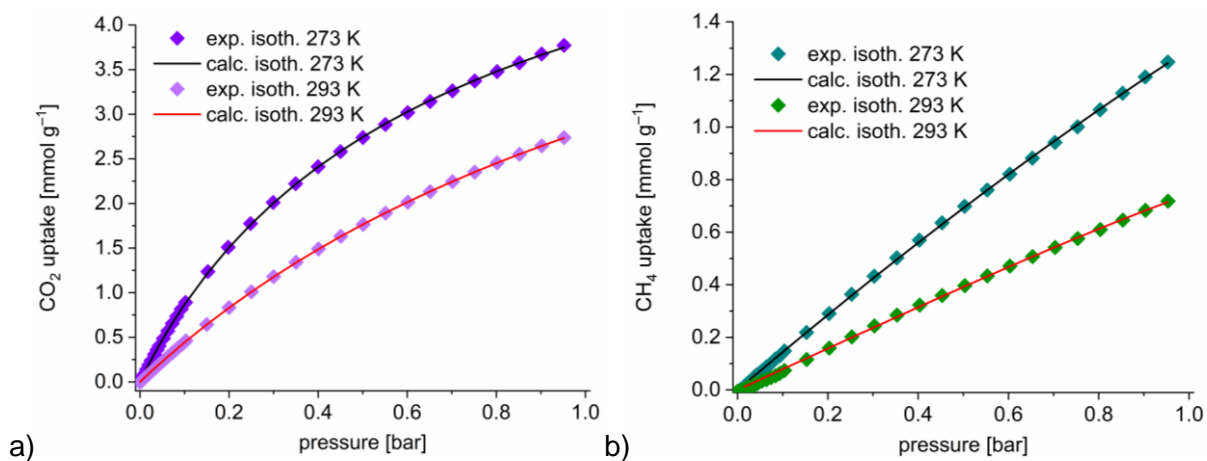

**Figure S13.** Experimental a) CO<sub>2</sub> and b) CH<sub>4</sub> adsorption isotherms of HHUD-4 with their corresponding Toth model fits at 273 and 293 K.

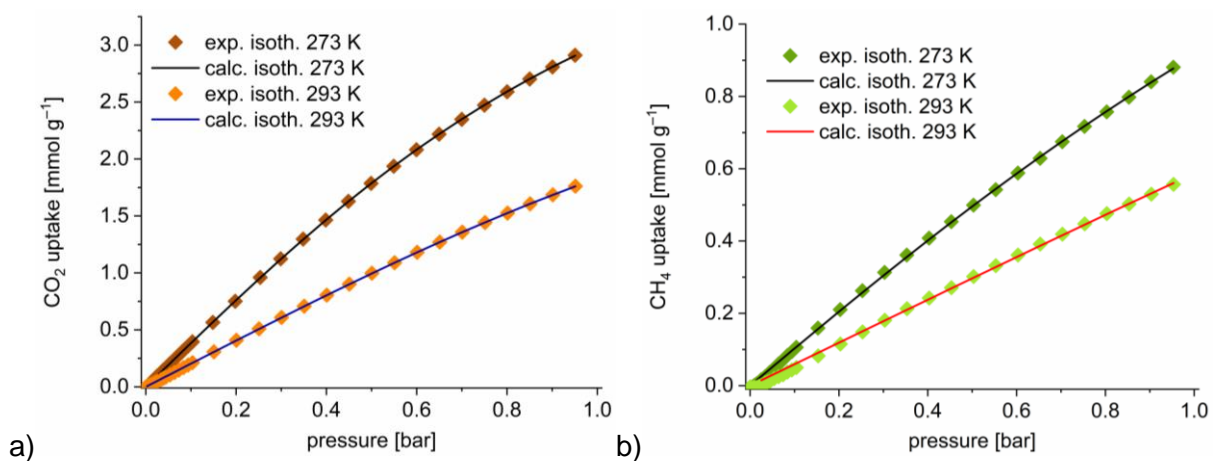

**Figure S14.** Experimental a) CO<sub>2</sub> and b) CH<sub>4</sub> adsorption isotherms of In-fum with their corresponding Toth model fits at 273 and 293 K.

**Table S6.** Toth fitting parameters for CO<sub>2</sub> and CH<sub>4</sub> adsorption isotherms for HHUD-4.

| Gas                                                  | CO <sub>2</sub> |          | CH <sub>4</sub> |          |          |
|------------------------------------------------------|-----------------|----------|-----------------|----------|----------|
|                                                      | Temperature [K] | 273      | 293             | 273      | 293      |
| maximal loading, $q_{\max}$ [mmol g <sup>-1</sup> ]* |                 | 6.731296 | 6.977597        | 5.499398 | 1.309495 |
| affinity constant, $k$ [bar <sup>-1</sup> ]          |                 | 1.551246 | 0.675349        | 0.263016 | 0.602038 |
| heterogeneity exponent, $t$                          |                 | 0.9086   | 1.0021          | 1.3643   | 3.1753   |
| Correlation coefficient R <sup>2</sup>               |                 | 0.999954 | 0.999983        | 0.999834 | 0.999092 |

\*amount adsorbed at saturation, that is maximal loading for the asymptotic curvature of the adsorption isotherm

**Table S7.** Toth fitting parameters for CO<sub>2</sub> and CH<sub>4</sub> adsorption isotherms for In-fum.

| Gas                                                  | CO <sub>2</sub> |          | CH <sub>4</sub> |          |
|------------------------------------------------------|-----------------|----------|-----------------|----------|
| Temperature [K]                                      | 273             | 293      | 273             | 293      |
| maximal loading, $q_{\max}$ [mmol g <sup>-1</sup> ]* | 4.722194        | 3.519293 | 2.388246        | 1.633522 |
| affinity constant, $k$ [bar <sup>-1</sup> ]          | 0.815456        | 0.578060 | 0.432077        | 0.363842 |
| heterogeneity exponent, $t$                          | 2.0282          | 2.3315   | 1.7211          | 3.1443   |
| Correlation coefficient R <sup>2</sup>               | 0.999987        | 0.999975 | 0.999630        | 0.997794 |

\*amount adsorbed at saturation, that is maximal loading for the asymptotic curvature of the adsorption isotherm

**Table S8.** Calculated IAST-selectivities for CO<sub>2</sub> and CH<sub>4</sub> mixtures at 273 and 293 K for HHUD-4 and In-fum at selected molar fractions.

| MOF    | Gases (X <sub>1</sub> and X <sub>2</sub> ) at T | IAST selectivity at molar fraction<br>(rounded to the next integer value) |     |
|--------|-------------------------------------------------|---------------------------------------------------------------------------|-----|
|        |                                                 | 0.01                                                                      | 0.5 |
| HHUD-4 | CO <sub>2</sub> and CH <sub>4</sub> at 273 K    | 7                                                                         | 6   |
|        | CO <sub>2</sub> and CH <sub>4</sub> at 293 K    | 6                                                                         | 7   |
| In-Fum | CO <sub>2</sub> and CH <sub>4</sub> at 273 K    | 3                                                                         | 4   |
|        | CO <sub>2</sub> and CH <sub>4</sub> at 293 K    | 4                                                                         | 4   |

## Section S5: Vapor sorption experiments

**Table S9.** Benzene, cyclohexane and n-hexane uptake for HHUD-4 and In-fum at specific  $p/p_0$  values.

| $p/p_0$                                                         | HHUD-4     | In-fum     |
|-----------------------------------------------------------------|------------|------------|
| benzene uptake [ $\text{mg g}^{-1}$ ] (% of maximum uptake)     |            |            |
| 0.02                                                            | 98 (36 %)  | 78 (28 %)  |
| 0.05                                                            | 165 (61 %) | 114 (41 %) |
| 0.08                                                            | 182 (68 %) | 134 (48 %) |
| 0.1                                                             | 190 (71 %) | 147 (53 %) |
| 0.3                                                             | 219 (81 %) | 194 (70 %) |
| 0.9                                                             | 269        | 278        |
| cyclohexane uptake [ $\text{mg g}^{-1}$ ] (% of maximum uptake) |            |            |
| 0.02                                                            | 41 (35 %)  | 34 (38 %)  |
| 0.05                                                            | 82 (71 %)  | 40 (45 %)  |
| 0.08                                                            | 87 (75 %)  | 43 (48 %)  |
| 0.1                                                             | 89 (77 %)  | 46 (52 %)  |
| 0.3                                                             | 98 (84 %)  | 57 (64 %)  |
| 0.9                                                             | 116        | 89         |
| n-hexane uptake [ $\text{mg g}^{-1}$ ] (% of maximum uptake)    |            |            |
| 0.02                                                            | 71 (35 %)  | 150 (61 %) |
| 0.05                                                            | 118 (58 %) | 160 (65 %) |
| 0.08                                                            | 126 (61 %) | 165 (67 %) |
| 0.1                                                             | 129 (63 %) | 169 (69 %) |
| 0.3                                                             | 149 (73 %) | 189 (77 %) |
| 0.9                                                             | 205        | 245        |

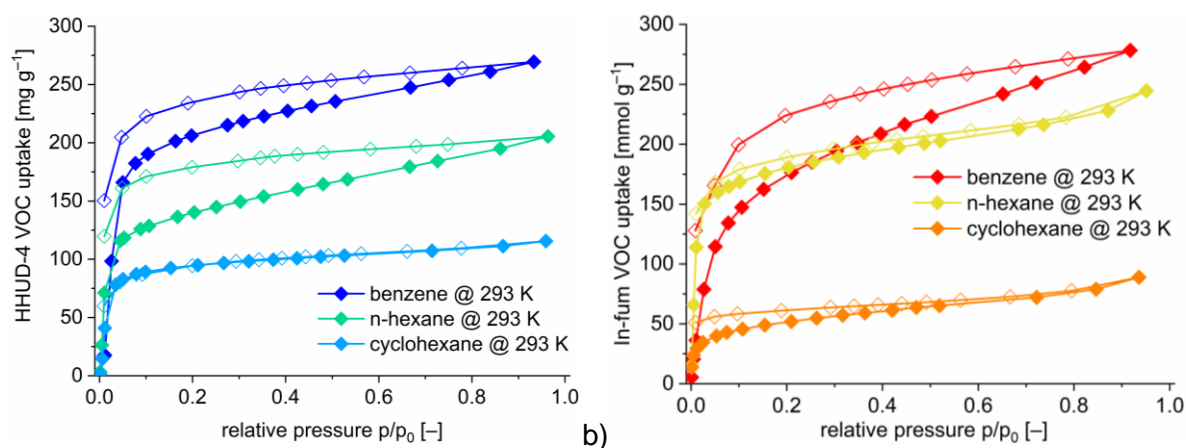

**Figure S15.** Benzene, cyclohexane and n-hexane vapor sorption isotherms at 293 K for a) HHUD-4 and b) In-fum [filled symbols for adsorption, empty symbols for desorption].

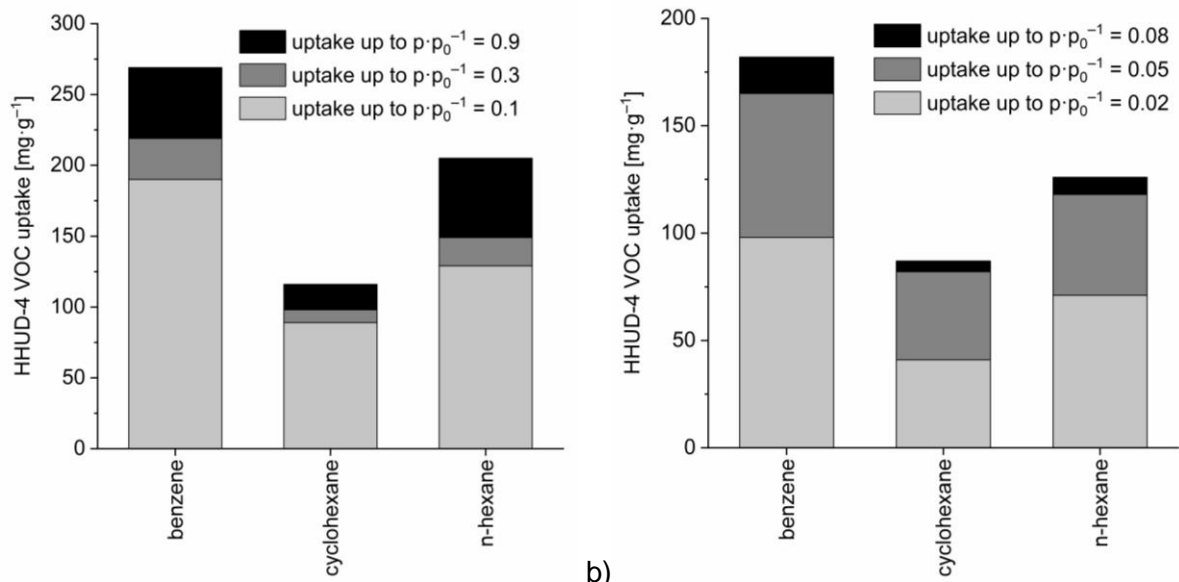

**Figure S16.** Benzene, cyclohexane and n-hexane uptake capacity at 293 K of HHUD-4 at different relative pressures a)  $p/p_0 = 0.1, 0.3$  and  $0.9$  and b)  $p/p_0 = 0.02, 0.05$  and  $0.08$  (specific values in Table S9).

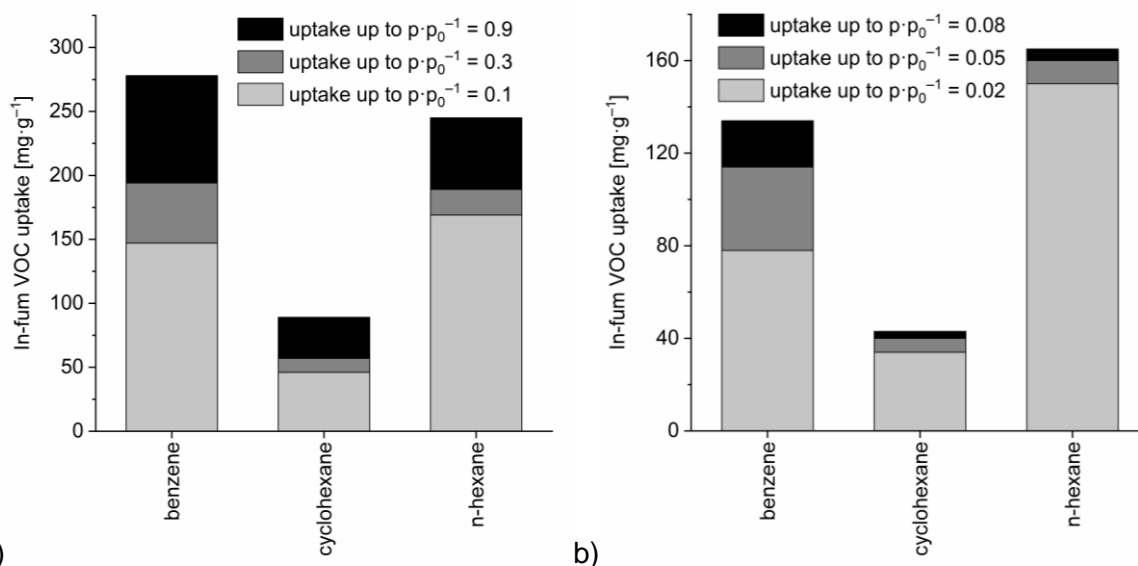

**Figure S17.** Benzene, cyclohexane and n-hexane uptake capacity at 293 K of In-fum at different relative pressures a)  $p/p_0 = 0.1, 0.3$  and  $0.9$  and b)  $p/p_0 = 0.02, 0.05$  and  $0.08$  (specific values in Table S9).

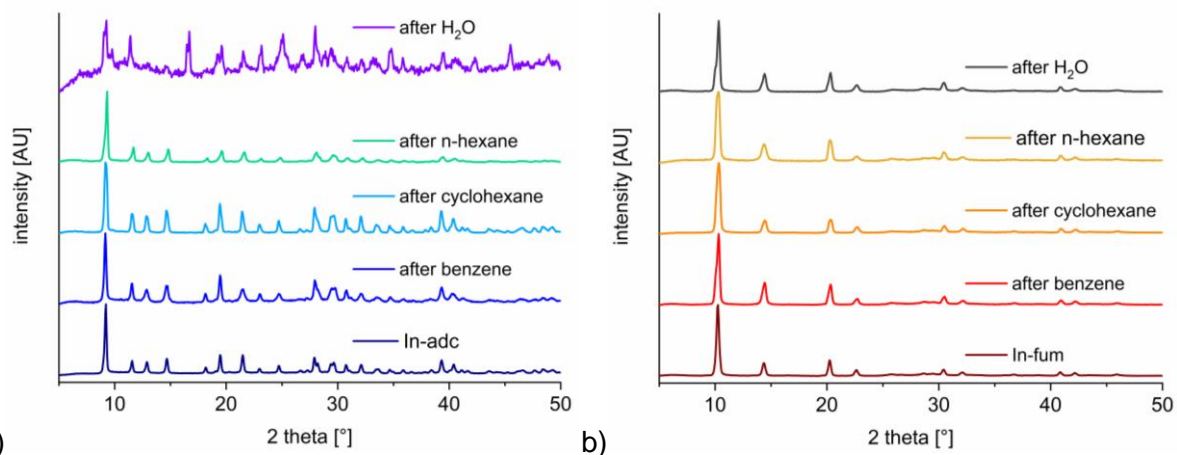

**Figure S18.** PXRD diffraction patterns of a) HHUD-4 and b) In-fum before and after vapor sorption experiments with benzene, cyclohexane, n-hexane and water.

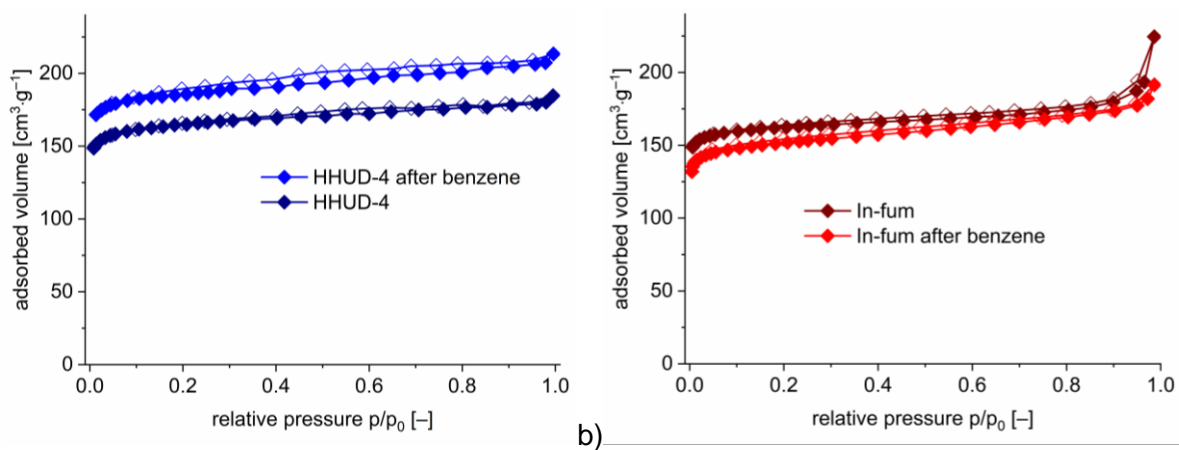

**Figure S19.** Volumetric nitrogen sorption measurements at 77 K of a) HHUD-4 and b) In-fum before and after benzene vapor sorption experiment (filled symbols for adsorption, empty symbols for desorption).

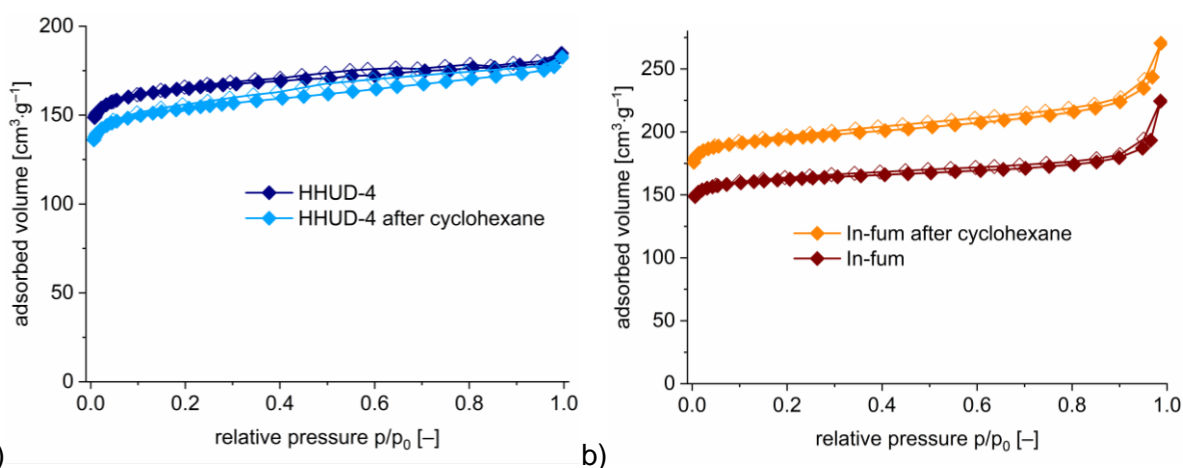

**Figure S20.** Volumetric nitrogen sorption measurements at 77 K of a) HHUD-4 and b) In-fum before and after cyclohexane vapor sorption experiment (filled symbols for adsorption, empty symbols for desorption).

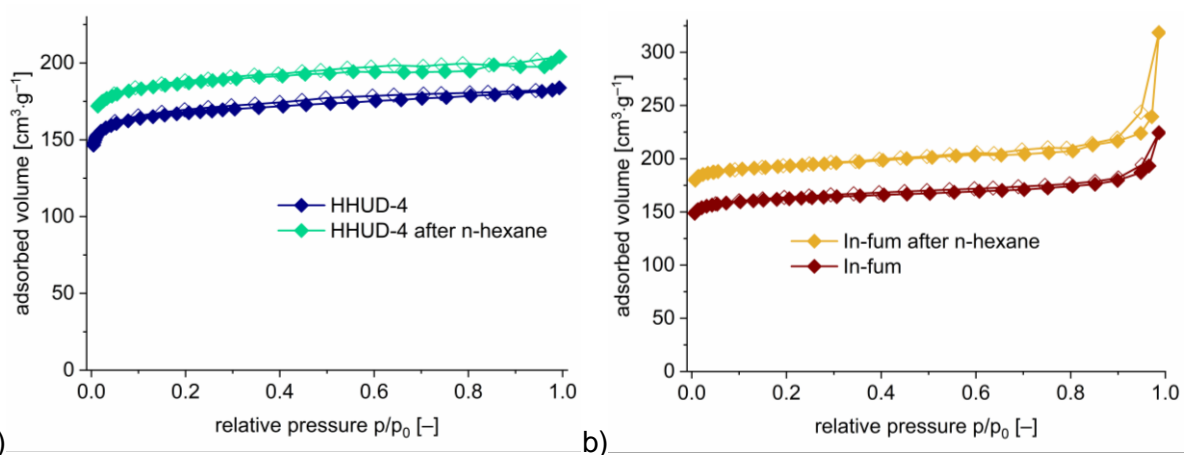

**Figure S21.** Volumetric nitrogen sorption measurements at 77 K of a) HHUD-4 and b) In-fum before and after n-hexane vapor sorption experiment (filled symbols for adsorption, empty symbols for desorption).

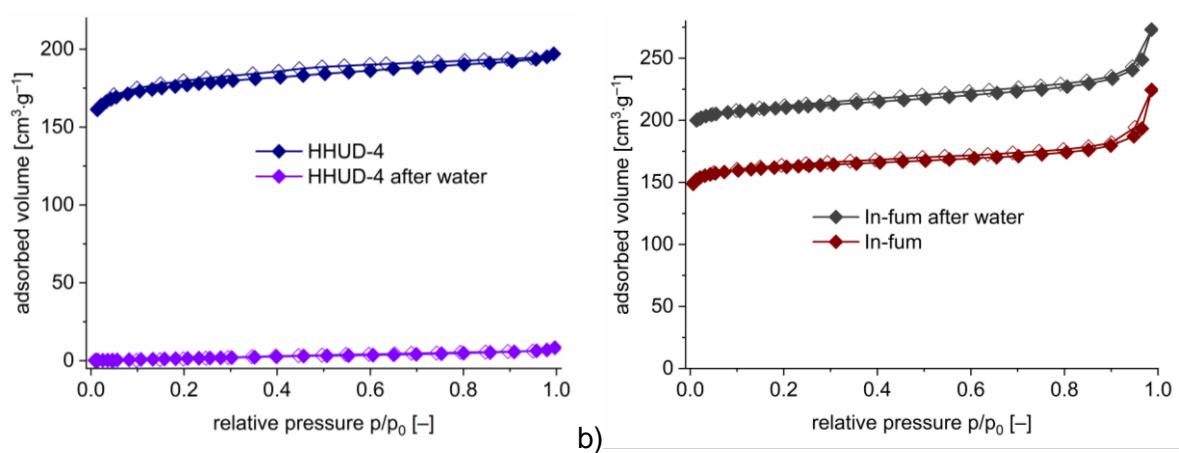

**Figure S22.** Volumetric nitrogen sorption measurements at 77 K of a) HHUD-4 and b) In-fum before and after water vapor sorption experiment (filled symbols for adsorption, empty symbols for desorption).

**Table S10.** BET surface areas and pore volume of HHUD-4 and In-fum samples after vapor sorption experiments.

| sample                     | BET surface area<br>[m <sup>2</sup> g <sup>-1</sup> ] | pore volume at p/p <sub>0</sub> = 0.95<br>[cm <sup>3</sup> g <sup>-1</sup> ] |
|----------------------------|-------------------------------------------------------|------------------------------------------------------------------------------|
| HHUD-4 before VOC sorption | 661                                                   | 0.277                                                                        |
| HHUD-4 after benzene       | 746                                                   | 0.319                                                                        |
| HHUD-4 after cyclohexane   | 613                                                   | 0.271                                                                        |
| HHUD-4 after n-hexane      | 745                                                   | 0.305                                                                        |
| HHUD-4 after water         | ~ 0                                                   | ~ 0                                                                          |
| In-fum before VOC sorption | 661                                                   | 0.289                                                                        |
| In-fum after benzene       | 609                                                   | 0.274                                                                        |
| In-fum after cyclohexane   | 792                                                   | 0.346                                                                        |
| In-fum after n-hexane      | 791                                                   | 0.346*                                                                       |
| In-fum after water         | 867                                                   | 0.371                                                                        |

\*p/p<sub>0</sub> = 0.90, due to an increase in uptake (overlap with a type II isotherm at higher pressures)



## Section S6: Fitting and IAST calculations for the vapor sorption experiments

Similar to the procedure in Section S4: Fitting and IAST calculations for CO<sub>2</sub>/CH<sub>4</sub> mixtures, the adsorption isotherms for benzene, cyclohexane and n-hexane at 293 K were fitted with the 3PSim software.<sup>17</sup> For a better comparability all isotherms were fitted with the dual-site Langmuir Sips (DSLAI Sips) model. The pressure range above 0.09 bar for the cyclohexane adsorption isotherms of both HHUD-4 and In-fum were excluded from fitting to reduce the fitting error and obtain more accurate selectivities.

DSLAI Sips:

$$q_{eq} = q_{max} \left( \frac{K_1 \cdot p}{1 + K_1 \cdot p} + \frac{(K_2 \cdot p)^t}{(1 + K_2 \cdot p)^t} \right)$$

$q_{eq}$  = amount adsorbed [mmol g<sup>-1</sup>]

$q_{max}$  = maximal loading [mmol g<sup>-1</sup>]

$K_1$  and  $K_2$  = affinity constant for adsorption [bar<sup>-1</sup>]

$p$  = pressure [bar]

$t$  = heterogeneity exponent

The IAST (ideal adsorbed solution theory) selectivity calculation were done with the “IAST with DSLAI Sips” isotherm model with two components. The selectivities were calculated over a pressure range of the fitted isotherms from 0 to 0.09 bar with a constant vapor composition of 50:50 of both VOCs with the following formula:

$$S = \frac{x_1/x_2}{y_1/y_2}$$

where  $y_1$  and  $y_2$  are the molar fractions of the VOC and  $x_1$  and  $x_2$  are represents the adsorbed vapor amount.

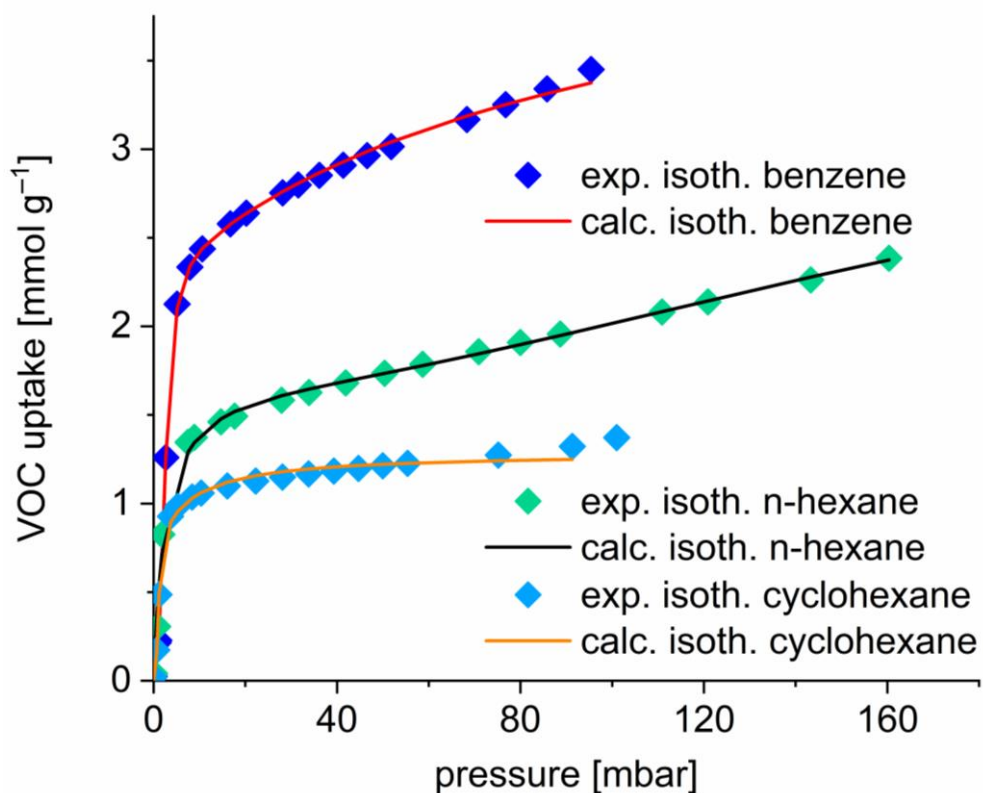

**Figure S23.** Experimental benzene, cyclohexane and n-hexane adsorption isotherms of HHUD-4 at 293 K with their corresponding DSLAISips model fits.

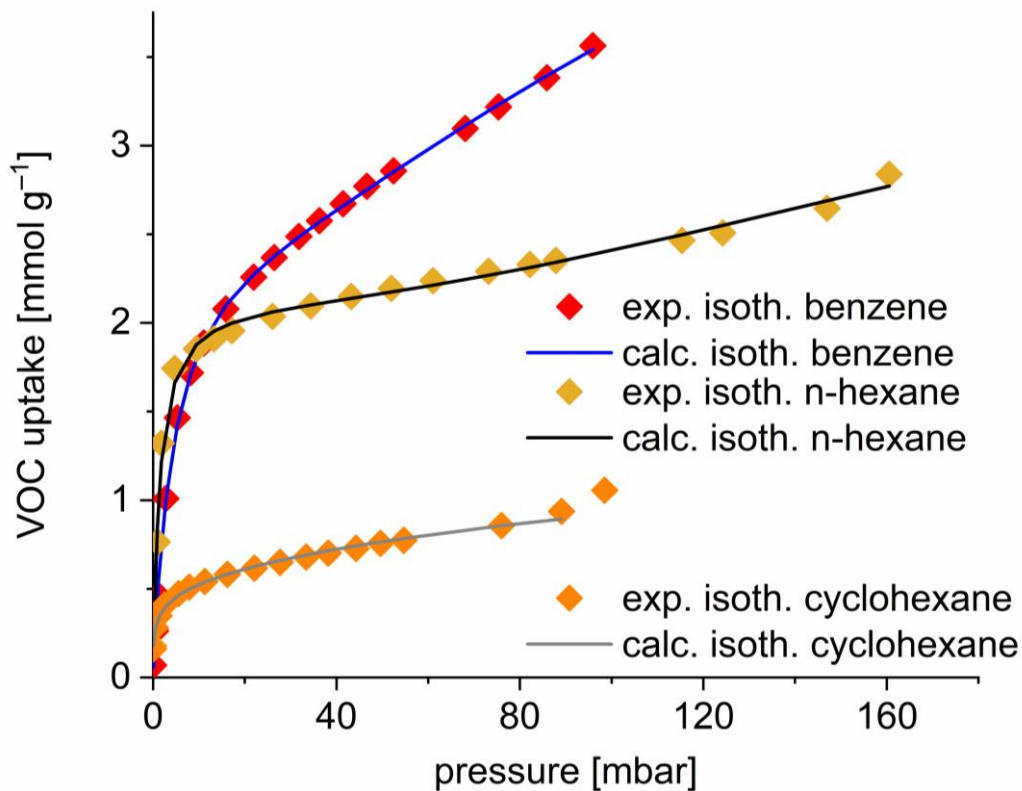

**Figure S24.** Experimental benzene, cyclohexane and n-hexane adsorption isotherms of In-fum at 293 K with their corresponding DSLAISips model fits.

**Table S11.** DSLAISips fitting parameters for benzene, cyclohexane and n-hexane adsorption isotherms for HHUD-4.

| Vapor                                               | benzene    | cyclohexane | n-hexane   |
|-----------------------------------------------------|------------|-------------|------------|
| maximal loading, $q_{\max}$ [mmol g <sup>-1</sup> ] | 2.255265   | 0.642721    | 1.724326   |
| affinity constant, $K_1$ [bar <sup>-1</sup> ]       | 10.317593  | 180.740683  | 394.354743 |
| affinity constant, $K_2$ [bar <sup>-1</sup> ]       | 396.315605 | 910.177530  | 5.066080   |
| heterogeneity exponent, $t$                         | 2.831478   | 3.891550    | 2.094568   |
| Correlation coefficient R <sup>2</sup>              | 0.999432   | 0.994705    | 0.992522   |

**Table S12.** DSLAISips fitting parameters for benzene, cyclohexane and n-hexane adsorption isotherms for In-fum.

| Vapor                                               | benzene    | cyclohexane | n-hexane   |
|-----------------------------------------------------|------------|-------------|------------|
| maximal loading, $q_{\max}$ [mmol g <sup>-1</sup> ] | 2.649726   | 0.829770    | 2.151630   |
| affinity constant, $K_1$ [bar <sup>-1</sup> ]       | 217.494087 | 5.493819    | 722.691922 |
| affinity constant, $K_2$ [bar <sup>-1</sup> ]       | 8.201325   | 252.500453  | 4.165343   |
| heterogeneity exponent, $t$                         | 1.995158   | 0.348853    | 2.142852   |
| Correlation coefficient R <sup>2</sup>              | 0.999661   | 0.994578    | 0.993071   |

**Table S13.** Calculated IAST-selectivities for different VOC-mixtures for HHUD-4 and In-fum at selected pressures.

| MOF    | VOC ( $X_1$ and $X_2$ )          | IAST Selectivity for $X_1/X_2$<br>(rounded to the next integer value) |         |         |
|--------|----------------------------------|-----------------------------------------------------------------------|---------|---------|
|        |                                  | 10 mbar                                                               | 50 mbar | 90 mbar |
| HHUD-4 | benzene and cyclohexane          | 2                                                                     | 9       | 17      |
|        | benzene and <i>n</i> -hexane     | 1                                                                     | 3       | 3       |
|        | <i>n</i> -hexane and cyclohexane | 2                                                                     | 3       | 3       |
| In-Fum | benzene and cyclohexane          | 3                                                                     | 14      | 23      |
|        | benzene and <i>n</i> -hexane     | 2                                                                     | 2       | 1       |
|        | <i>n</i> -hexane and cyclohexane | 13                                                                    | 37      | 46      |

## Section S7: Theoretical calculations with the HHUD-4 crystal structure data

**Table S14.** Theoretical surface area and pore volume of HHUD-4.

| <b>Mercury 'void' calculation<sup>2</sup></b>                                                                                           |                  |
|-----------------------------------------------------------------------------------------------------------------------------------------|------------------|
| Probe radius 1.2 Å, grid spacing 0.7 Å<br>Void volume [Å <sup>3</sup> ] (% of unit cell)<br>specific [cm <sup>3</sup> g <sup>-1</sup> ] | 773 (63)<br>0.48 |
| Probe radius 0.7 Å, grid spacing 0.7 Å<br>Void volume [Å <sup>3</sup> ] (% of unit cell)<br>specific [cm <sup>3</sup> g <sup>-1</sup> ] | 790 (64)<br>0.49 |
| <b>Platon 'Calc Void'<sup>18,19</sup></b>                                                                                               |                  |
| Total potential solvent area [Å <sup>3</sup> ] (% of unit cell)<br>specific [cm <sup>3</sup> g <sup>-1</sup> ]                          | 738 (60)<br>0.46 |
| <b>CrystalExplorer 'Crystal voids' calculation<sup>20,21</sup></b>                                                                      |                  |
| Surface area S <sub>unit cell</sub> (isovalue 0.002) [Å <sup>2</sup> ]<br>specific [m <sup>2</sup> g <sup>-1</sup> ]                    | 362<br>2235      |
| Surface area S <sub>unit cell</sub> (isovalue 0.003) [Å <sup>2</sup> ]<br>specific [m <sup>2</sup> g <sup>-1</sup> ]                    | 364<br>2247      |
| Pore volume (isovalue 0.002) [Å <sup>3</sup> ]<br>specific [cm <sup>3</sup> g <sup>-1</sup> ]                                           | 716<br>0.44      |
| Pore volume (isovalue 0.003) [Å <sup>3</sup> ]<br>specific [cm <sup>3</sup> g <sup>-1</sup> ]                                           | 761<br>0.47      |

Theoretical specific surface areas are calculated according to  $(S_{\text{Unit Cell}} \cdot N_A)/(Z \cdot M)$  and theoretical specific pore volumes are calculated according to  $(\text{Void Volume} \cdot N_A)/(Z \cdot M)$  or  $(\text{Solvent Accessible Volume} \cdot N_A)/(Z \cdot M)$ ;

$Z = 4$  (number of asymmetric formula units),  $N_A = \text{Avogadro's constant: } 6.022 \cdot 10^{23} \text{ mol}^{-1}$ ,  $M = 243.87 \text{ g mol}^{-1}$  (molecular weight of the asymmetric formula unit).

### Topology analysis for HHUD-4 with ToposPro and the Topocryst database<sup>22,23,24,25</sup>

```
#####
1:C4 H In O5 + solvent/intercluster bonds for rings>6
#####
```

Topology for Bk1

-----

Atom Bk1 links by bridge ligands and has

| Common vertex with | R(A-A) |         |        |          |        |   |
|--------------------|--------|---------|--------|----------|--------|---|
| Bk 1               | 1.5000 | 0.5000  | 0.3750 | ( 1 0 0) | 9.802A | 1 |
| Bk 1               | 0.5000 | -0.5000 | 0.3750 | ( 0-1 0) | 9.802A | 1 |

Bk 1 -0.5000 0.5000 0.3750 (-1 0 0) 9.802A 1  
Bk 1 0.5000 1.5000 0.3750 ( 0 1 0) 9.802A 1

-----  
Structural group analysis  
-----

-----  
Structural group No 1  
-----

Structure consists of plane layers ( 0 0 1) with Bk  
Num. groups=4; Thickness=4.00; Distances to Neighbors=3.203; 3.203

Coordination sequences  
-----

Bk1: 1 2 3 4 5 6 7 8 9 10  
Num 4 8 12 16 20 24 28 32 36 40  
Cum 5 13 25 41 61 85 113 145 181 221

-----  
TD10=221

Vertex symbols for selected sublattice  
-----

Bk1 Point symbol:{4<sup>4</sup>.6<sup>2</sup>}  
Extended point symbol:[4.4.4.4.6(2).6(2)]

-----  
Point symbol for net: {4<sup>4</sup>.6<sup>2</sup>}

4-c net; uninodal net

You have to increase Max.Ring value to compute plane net VS correctly!

Topological type: **sql** (topos&RCSR.ttd) {4<sup>4</sup>.6<sup>2</sup>} - VS [4.4.4.4.\*.\*] (17828 types in 4 databases)

Elapsed time: 3.80 sec.

## Section S8: HHUD-4 crystal data

### Refinement

The hydrogen atoms for OH were positioned geometrically (O—H = 0.98 Å) and refined using a riding model (AFIX 148) with  $U_{\text{iso}}(\text{H}) = 1.5U_{\text{eq}}$ .

### Computing details

Data collection: *APEX2* (Bruker, 2012); cell refinement: *SAINTE* (Bruker, 2012); data reduction: *SAINTE* (Bruker, 2012); program(s) used to solve structure: *SHELXT-2015* (Sheldrick 2015a); program(s) used to refine structure: *SHELXL2017/1* (Sheldrick, 2015b); molecular graphics: *DIAMOND* 4.3.1 (Brandenburg, 1999); software used to prepare material for publication: *SHELXL2017/1* (Sheldrick, 2015b).

### References

Bruker AXS. (2012). *APEX2*, *SAINTE*. Bruker AXS Inc., Madison, Wisconsin, USA. Brandenburg, K. (1999). *DIAMOND*. Crystal Impact GbR, Bonn, Germany. Sheldrick, G. M. (1996). *SADABS*. University of Göttingen, Germany. Sheldrick, G. M. (2008). *Acta Cryst.* A64, 112-122. Sheldrick, G. M. (2015a). *Acta Cryst.* A71, 3-8. Sheldrick, G. M. (2015b). *Acta Cryst.* C71, 3-8.

### S8.1 Crystal 1 (*In-adc\_P4<sub>1</sub>22*)

#### Crystal data

|                                           |                                                         |
|-------------------------------------------|---------------------------------------------------------|
| C <sub>4</sub> HInO <sub>5</sub> +solvent | $D_x = 1.316 \text{ Mg m}^{-3}$                         |
| $M_r = 243.87$                            | Mo $K\alpha$ radiation, $\lambda = 0.71073 \text{ \AA}$ |
| Tetragonal, <i>P4<sub>1</sub>22</i>       | Cell parameters from 6739 reflections                   |
| $a = 9.8021 (7) \text{ \AA}$              | $\theta = 2.6\text{--}26.4^\circ$                       |
| $c = 12.812 (1) \text{ \AA}$              | $\mu = 1.90 \text{ mm}^{-1}$                            |
| $V = 1231.0 (2) \text{ \AA}^3$            | $T = 140 \text{ K}$                                     |
| $Z = 4$                                   | Octahedral, clear colourless                            |
| $F(000) = 456$                            | 0.31 × 0.18 × 0.17 mm                                   |

#### Data collection

|                                                                      |                                                                        |
|----------------------------------------------------------------------|------------------------------------------------------------------------|
| Bruker Kappa APEX-II CCD area detector diffractometer                | 1284 independent reflections                                           |
| Radiation source: microfocus sealed tube                             | 1266 reflections with $I > 2\sigma(I)$                                 |
| Multilayer mirror monochromator                                      | $R_{\text{int}} = 0.023$                                               |
| $\omega$ scans, $\phi$ scans                                         | $\theta_{\text{max}} = 26.5^\circ$ , $\theta_{\text{min}} = 2.1^\circ$ |
| Absorption correction: multi-scan ( <i>SADABS</i> ; Sheldrick, 1996) | $h = -12 \rightarrow 11$                                               |
| $T_{\text{min}} = 0.882$ , $T_{\text{max}} = 1.000$                  | $k = -12 \rightarrow 12$                                               |
| 8314 measured reflections                                            | $l = -16 \rightarrow 12$                                               |

### Refinement

|                                                                |                                                                                                                                                   |
|----------------------------------------------------------------|---------------------------------------------------------------------------------------------------------------------------------------------------|
| Refinement on $F^2$                                            | Secondary atom site location: difference Fourier map                                                                                              |
| Least-squares matrix: full                                     | Hydrogen site location: inferred from neighbouring sites                                                                                          |
| $R[F^2 > 2\sigma(F^2)] = 0.009$                                | H-atom parameters constrained                                                                                                                     |
| $wR(F^2) = 0.025$                                              | $w = 1/[\sigma^2(F_o^2) + (0.0096P)^2 + 0.2009P]$ where $P = (F_o^2 + 2F_c^2)/3$                                                                  |
| $S = 1.13$                                                     | $(\Delta/\sigma)_{\max} = 0.001$                                                                                                                  |
| 1284 reflections                                               | $\Delta)_{\max} = 0.21 \text{ e } \text{Å}^{-3}$                                                                                                  |
| 47 parameters                                                  | $\Delta)_{\min} = -0.30 \text{ e } \text{Å}^{-3}$                                                                                                 |
| 0 restraints                                                   | Absolute structure: Flack x determined using 476 quotients $[(I+)-(I-)]/[(I+)+(I-)]$ (Parsons, Flack and Wagner, Acta Cryst. B69 (2013) 249-259). |
| Primary atom site location: structure-invariant direct methods | Absolute structure parameter: -0.017 (17)                                                                                                         |

### Fractional atomic coordinates and isotropic or equivalent isotropic displacement parameters ( $\text{Å}^2$ ) for crystal 1 (In-adc\_P4<sub>1</sub>22)

|     | x            | y            | z            | $U_{\text{iso}}^*/U_{\text{eq}}$ |
|-----|--------------|--------------|--------------|----------------------------------|
| In1 | 0.500000     | 0.61899 (2)  | 0.500000     | 0.01067 (6)                      |
| O1  | 0.48535 (15) | 0.48535 (15) | 0.375000     | 0.0160 (4)                       |
| H1  | 0.416816     | 0.416815     | 0.375001     | 0.019*                           |
| C1  | 0.5564 (2)   | 0.8056 (2)   | 0.31063 (15) | 0.0187 (4)                       |
| O2  | 0.48882 (19) | 0.78840 (13) | 0.39190 (10) | 0.0226 (3)                       |
| C2  | 0.5553 (2)   | 0.9440 (2)   | 0.26710 (16) | 0.0241 (4)                       |
| O3  | 0.62843 (14) | 0.72099 (12) | 0.26194 (10) | 0.0202 (3)                       |

### Atomic displacement parameters ( $\text{Å}^2$ ) for crystal 1 (In-adc\_P4<sub>1</sub>22)

|     | $U^{11}$    | $U^{22}$    | $U^{33}$    | $U^{12}$     | $U^{13}$    | $U^{23}$    |
|-----|-------------|-------------|-------------|--------------|-------------|-------------|
| In1 | 0.01167 (9) | 0.01214 (9) | 0.00819 (8) | 0.000        | 0.00052 (7) | 0.000       |
| O1  | 0.0184 (6)  | 0.0184 (6)  | 0.0114 (7)  | -0.0076 (10) | 0.0037 (5)  | -0.0037 (5) |
| C1  | 0.0247 (10) | 0.0153 (9)  | 0.0162 (9)  | -0.0003 (8)  | -0.0028 (8) | 0.0025 (8)  |
| O2  | 0.0327 (8)  | 0.0173 (6)  | 0.0180 (6)  | 0.0045 (7)   | 0.0035 (7)  | 0.0043 (5)  |
| C2  | 0.0363 (11) | 0.0173 (8)  | 0.0186 (10) | 0.0004 (8)   | 0.0040 (9)  | 0.0010 (8)  |
| O3  | 0.0275 (7)  | 0.0122 (6)  | 0.0208 (6)  | -0.0030 (5)  | 0.0026 (7)  | 0.0002 (6)  |

### Geometric parameters ( $\text{Å}$ , $^\circ$ ) for crystal 1 (In-adc\_P4<sub>1</sub>22)

|                       |             |                     |           |
|-----------------------|-------------|---------------------|-----------|
| In1—O1                | 2.0740 (10) | O1—H1               | 0.9500    |
| In1—O1 <sup>i</sup>   | 2.0740 (10) | C1—O2               | 1.245 (2) |
| In1—O2                | 2.1651 (12) | C1—O3               | 1.256 (2) |
| In1—O2 <sup>ii</sup>  | 2.1651 (12) | C1—C2               | 1.466 (3) |
| In1—O3 <sup>iii</sup> | 2.1735 (12) | C2—C2 <sup>iv</sup> | 1.183 (4) |

|                                         |             |                                        |             |
|-----------------------------------------|-------------|----------------------------------------|-------------|
| In1—O3 <sup>i</sup>                     | 2.1735 (12) |                                        |             |
|                                         |             |                                        |             |
| O1—In1—O1 <sup>i</sup>                  | 101.66 (6)  | O2—In1—O3 <sup>i</sup>                 | 87.82 (6)   |
| O1—In1—O2                               | 89.25 (5)   | O2 <sup>ii</sup> —In1—O3 <sup>i</sup>  | 88.44 (6)   |
| O1 <sup>i</sup> —In1—O2                 | 169.08 (4)  | O3 <sup>iii</sup> —In1—O3 <sup>i</sup> | 175.12 (7)  |
| O1—In1—O2 <sup>ii</sup>                 | 169.08 (4)  | In1 <sup>v</sup> —O1—In1               | 120.58 (10) |
| O1 <sup>i</sup> —In1—O2 <sup>ii</sup>   | 89.25 (5)   | In1 <sup>v</sup> —O1—H1                | 119.7       |
| O2—In1—O2 <sup>ii</sup>                 | 79.84 (7)   | In1—O1—H1                              | 119.7       |
| O1—In1—O3 <sup>iii</sup>                | 92.38 (5)   | O2—C1—O3                               | 128.67 (18) |
| O1 <sup>i</sup> —In1—O3 <sup>iii</sup>  | 90.70 (5)   | O2—C1—C2                               | 116.09 (18) |
| O2—In1—O3 <sup>iii</sup>                | 88.44 (6)   | O3—C1—C2                               | 115.21 (17) |
| O2 <sup>ii</sup> —In1—O3 <sup>iii</sup> | 87.82 (6)   | C1—O2—In1                              | 127.73 (13) |
| O1—In1—O3 <sup>i</sup>                  | 90.70 (5)   | C2 <sup>iv</sup> —C2—C1                | 179.3 (3)   |
| O1 <sup>i</sup> —In1—O3 <sup>i</sup>    | 92.38 (5)   | C1—O3—In1 <sup>v</sup>                 | 132.03 (13) |

Symmetry codes: (i)  $-y+1, x, z+1/4$ ; (ii)  $-x+1, y, -z+1$ ; (iii)  $y, x, -z+3/4$ ; (iv)  $x, -y+2, -z+1/2$ ; (v)  $y, -x+1, z-1/4$ .

## S8.2 Crystal 2 (*In-adc*, $P4_322$ )

### Crystal data

|                                  |                                                         |
|----------------------------------|---------------------------------------------------------|
| C <sub>4</sub> HInO <sub>5</sub> | $D_x = 1.318 \text{ Mg m}^{-3}$                         |
| $M_r = 243.87$                   | Mo $K\alpha$ radiation, $\lambda = 0.71073 \text{ \AA}$ |
| Tetragonal, $P4_322$             | Cell parameters from 6150 reflections                   |
| $a = 9.8015 (9) \text{ \AA}$     | $\theta = 2.6\text{--}30.6^\circ$                       |
| $c = 12.7970 (14) \text{ \AA}$   | $\mu = 1.90 \text{ mm}^{-1}$                            |
| $V = 1229.4 (3) \text{ \AA}^3$   | $T = 140 \text{ K}$                                     |
| $Z = 4$                          | Octahedral, clear colourless                            |
| $F(000) = 456$                   | $0.24 \times 0.22 \times 0.20 \text{ mm}$               |

### Data collection

|                                                                      |                                                                        |
|----------------------------------------------------------------------|------------------------------------------------------------------------|
| Bruker Kappa APEX-II CCD area detector diffractometer                | 1889 independent reflections                                           |
| Radiation source: microfocus sealed tube                             | 1843 reflections with $I > 2\sigma(I)$                                 |
| Multilayer mirror monochromator                                      | $R_{\text{int}} = 0.018$                                               |
| $\omega$ scans, $\phi$ scans                                         | $\theta_{\text{max}} = 30.6^\circ$ , $\theta_{\text{min}} = 2.1^\circ$ |
| Absorption correction: multi-scan ( <i>SADABS</i> ; Sheldrick, 1996) | $h = -1111$                                                            |
| $T_{\text{min}} = 0.578$ , $T_{\text{max}} = 0.685$                  | $k = -1114$                                                            |
| 7274 measured reflections                                            | $l = -1718$                                                            |



### Refinement

|                                 |                                                                                                                                                     |
|---------------------------------|-----------------------------------------------------------------------------------------------------------------------------------------------------|
| Refinement on $F^2$             | Hydrogen site location: inferred from neighbouring sites                                                                                            |
| Least-squares matrix: full      | H-atom parameters constrained                                                                                                                       |
| $R[F^2 > 2\sigma(F^2)] = 0.013$ | $w = 1/[\sigma^2(F_o^2) + (0.0169P)^2 + 0.2125P]$ where $P = (F_o^2 + 2F_c^2)/3$                                                                    |
| $wR(F^2) = 0.034$               | $(\Delta/\sigma)_{\max} < 0.001$                                                                                                                    |
| $S = 1.08$                      | $\Delta)_{\max} = 0.90 \text{ e } \text{Å}^{-3}$                                                                                                    |
| 1889 reflections                | $\Delta)_{\min} = -0.24 \text{ e } \text{Å}^{-3}$                                                                                                   |
| 47 parameters                   | Absolute structure: Flack x determined using 718 quotients $[(I+)-(I-)]/[I+(I+)+(I-)]$ (Parsons, Flack and Wagner, Acta Cryst. B69 (2013) 249-259). |
| 0 restraints                    | Absolute structure parameter: -0.009 (15)                                                                                                           |

### Fractional atomic coordinates and isotropic or equivalent isotropic displacement parameters ( $\text{Å}^2$ ) for crystal 2 (In-adc\_P4<sub>3</sub>22)

|     | x            | y            | z            | $U_{\text{iso}}^*/U_{\text{eq}}$ |
|-----|--------------|--------------|--------------|----------------------------------|
| In1 | 0.500000     | 0.38083 (2)  | 0.500000     | 0.01173 (5)                      |
| O1  | 0.48519 (14) | 0.51481 (14) | 0.375000     | 0.0171 (4)                       |
| H1  | 0.416656     | 0.583345     | 0.375000     | 0.020*                           |
| C1  | 0.5569 (2)   | 0.1942 (2)   | 0.31003 (14) | 0.0197 (4)                       |
| O3  | 0.62898 (14) | 0.27889 (13) | 0.26160 (10) | 0.0211 (3)                       |
| O2  | 0.48841 (19) | 0.21166 (13) | 0.39147 (10) | 0.0238 (3)                       |
| C2  | 0.5559 (2)   | 0.0557 (2)   | 0.26727 (14) | 0.0247 (4)                       |

### Atomic displacement parameters ( $\text{Å}^2$ ) for crystal 2 (In-adc\_P4<sub>3</sub>22)

|     | $U^{11}$    | $U^{22}$    | $U^{33}$    | $U^{12}$    | $U^{13}$    | $U^{23}$    |
|-----|-------------|-------------|-------------|-------------|-------------|-------------|
| In1 | 0.01293 (8) | 0.01347 (8) | 0.00880 (7) | 0.000       | 0.00052 (6) | 0.000       |
| O1  | 0.0196 (6)  | 0.0196 (6)  | 0.0121 (6)  | 0.0071 (8)  | 0.0034 (5)  | 0.0034 (5)  |
| C1  | 0.0259 (10) | 0.0160 (9)  | 0.0173 (8)  | 0.0009 (7)  | -0.0042 (7) | -0.0017 (6) |
| O3  | 0.0277 (7)  | 0.0138 (6)  | 0.0217 (6)  | 0.0026 (5)  | 0.0023 (6)  | -0.0003 (5) |
| O2  | 0.0330 (8)  | 0.0182 (6)  | 0.0202 (6)  | -0.0050 (6) | 0.0045 (6)  | -0.0053 (5) |
| C2  | 0.0381 (12) | 0.0173 (9)  | 0.0187 (9)  | -0.0005 (7) | 0.0023 (7)  | -0.0016 (7) |

### Geometric parameters ( $\text{Å}$ , °) for crystal 2 (In-adc\_P4<sub>3</sub>22)

|                       |             |                     |           |
|-----------------------|-------------|---------------------|-----------|
| In1—O1 <sup>i</sup>   | 2.0747 (10) | O1—H1               | 0.9500    |
| In1—O1                | 2.0747 (10) | C1—O2               | 1.252 (2) |
| In1—O2                | 2.1659 (13) | C1—O3               | 1.254 (2) |
| In1—O2 <sup>ii</sup>  | 2.1660 (13) | C1—C2               | 1.464 (3) |
| In1—O3 <sup>i</sup>   | 2.1745 (13) | C2—C2 <sup>iv</sup> | 1.178 (4) |
| In1—O3 <sup>iii</sup> | 2.1745 (13) |                     |           |
|                       |             |                     |           |

|                                        |            |                                         |             |
|----------------------------------------|------------|-----------------------------------------|-------------|
| O1 <sup>i</sup> —In1—O1                | 101.46 (6) | O2—In1—O3 <sup>iii</sup>                | 88.55 (6)   |
| O1 <sup>i</sup> —In1—O2                | 169.31 (4) | O2 <sup>ii</sup> —In1—O3 <sup>iii</sup> | 87.57 (6)   |
| O1—In1—O2                              | 89.23 (5)  | O3 <sup>i</sup> —In1—O3 <sup>iii</sup>  | 174.93 (7)  |
| O1 <sup>i</sup> —In1—O2 <sup>ii</sup>  | 89.23 (5)  | In1 <sup>v</sup> —O1—In1                | 120.39 (10) |
| O1—In1—O2 <sup>ii</sup>                | 169.31 (4) | In1 <sup>v</sup> —O1—H1                 | 119.8       |
| O2—In1—O2 <sup>ii</sup>                | 80.09 (7)  | In1—O1—H1                               | 119.8       |
| O1 <sup>i</sup> —In1—O3 <sup>i</sup>   | 92.58 (5)  | O2—C1—O3                                | 128.58 (18) |
| O1—In1—O3 <sup>i</sup>                 | 90.62 (5)  | O2—C1—C2                                | 115.73 (18) |
| O2—In1—O3 <sup>i</sup>                 | 87.57 (6)  | O3—C1—C2                                | 115.67 (17) |
| O2 <sup>ii</sup> —In1—O3 <sup>i</sup>  | 88.55 (6)  | C1—O3—In1 <sup>v</sup>                  | 131.96 (13) |
| O1 <sup>i</sup> —In1—O3 <sup>iii</sup> | 90.62 (5)  | C1—O2—In1                               | 127.61 (13) |
| O1—In1—O3 <sup>iii</sup>               | 92.58 (5)  | C2 <sup>iv</sup> —C2—C1                 | 179.58 (15) |

Symmetry codes: (i)  $y, -x+1, z+1/4$ ; (ii)  $-x+1, y, -z+1$ ; (iii)  $-y+1, -x+1, -z+3/4$ ; (iv)  $x, -y, -z+1/2$ ; (v)  $-y+1, x, z-1/4$ .

## Section S9: References

- 1 Y. Zhang, B. E. G. Lucier, S. M. McKenzie, M. Arhangelskis, A. J. Morris, T. Friščić, J. W. Reid, V. V. Terskikh, M. Chen and Y. Huang, *ACS Appl Mater. Interfaces*, 2018, **10**, 28582.
- 2 C. F. Macrae, I. Sovago, S. J. Cottrell, P. T. A. Galek, P. McCabe, E. Pidcock, M. Platings, G. P. Shields, J. S. Stevens, M. Towler and P. A. Wood, *J. Appl. Crystallogr.*, 2020, **53**, 226.
- 3 T. J. Matemb Ma Ntep, H. Reinsch, B. Moll, E. Hastürk, S. Gökpınar, H. Breitzke, C. Schlüsener, L. Schmolke, G. Buntkowsky and C. Janiak, *Chemistry*, 2018, **24**, 14048.
- 4 T. J. Matemb Ma Ntep, H. Reinsch, J. Liang and C. Janiak, *Dalton Trans.*, 2019, **48**, 15849.
- 5 T. J. Matemb Ma Ntep, H. Reinsch, C. Schlüsener, A. Goldman, H. Breitzke, B. Moll, L. Schmolke, G. Buntkowsky and C. Janiak, *Inorg. Chem.*, 2019, **58**, 10965.
- 6 Y. Wang, S. Yuan, Z. Hu, T. Kundu, J. Zhang, S. B. Peh, Y. Cheng, J. Dong, D. Yuan, H.-C. Zhou and D. Zhao, *ACS Sustainable Chem. Eng.*, 2019, **7**, 7118.
- 7 P. Brandt, S.-H. Xing, J. Liang, G. Kurt, A. Nuhnen, O. Weingart, C. Janiak, *ACS Appl Mater Interfaces* 2021, **13**, 29137–29149.
- 8 B. C. Camacho, R. P. Ribeiro, I. A. Esteves and J. P. Mota, *Sep. Purif. Technol.*, 2015, **141**, 150.
- 9 Z. Huang, P. Hu, J. Liu, F. Shen, Y. Zhang, K. Chai, Y. Ying, C. Kang, Z. Zhang and H. Ji, *Sep. Purif. Technol.*, 2022, **286**, 120446.
- 10 J. Pei, H.-M. Wen, X.-W. Gu, Q.-L. Qian, Y. Yang, Y. Cui, B. Li, B. Chen and G. Qian, *Angew. Chem. Int. Ed.*, 2021, **60**, 25068.
- 11 D. Shade, B. Marszalek and K. S. Walton, *Adsorption*, 2021, **27**, 227.
- 12 D. Damasceno Borges, P. Normand, A. Permiakova, R. Babarao, N. Heymans, D. S. Galvao, C. Serre, G. de Weireld and G. Maurin, *J. Phys. Chem. C*, 2017, **121**, 26822.
- 13 C. Jansen, N. Tannert, D. Lenzen, M. Bengsch, S. Millan, A. Goldman, D. N. Jordan, L. Sondermann, N. Stock and C. Janiak, *Z. Anorg. Allg. Chem.*, 2022, **648**, e202200170.
- 14 Y. E. Cheon and M. P. Suh, *Chem. Commun.*, 2009, 2296.
- 15 W. Zhou, H. Wu and T. Yildirim, *J. Am. Chem. Soc.*, 2008, **130**, 15268.
- 16 B. Chen, X. Zhao, A. Putkham, K. Hong, E. B. Lobkovsky, E. J. Hurtado, A. J. Fletcher and K. M. Thomas, *J. Am. Chem. Soc.*, 2008, **130**, 6411.
- 17 3P INSTRUMENTS, 3P sim, Version 1.1.0.7, Simulation and Evaluation Tool for mixSorb, 3P INSTRUMENTS 2018.
- 18 Spek, A.L. PLATON – A Multipurpose Crystallographic Tool (Utrecht University, Utrecht, The Netherlands) 2008; Farrugia, L.J. Windows implementation, Version 270519 (University of Glasgow, Scotland) 2019.
- 19 A. L. Spek, *Acta Crystallogr. D Biol. Crystallogr.*, 2009, **65**, 148.
- 20 M. J. Turner, J. J. McKinnon, D. Jayatilaka and M. A. Spackman, *CrystEngComm*, 2011, **13**, 1804.
- 21 J. J. McKinnon, M. A. Spackman and A. S. Mitchell, *Acta Crystallogr. B*, 2004, **60**, 627.
- 22 E. V. Alexandrov, A. P. Shevchenko and V. A. Blatov, *Cryst. Growth Des.*, 2019, **19**, 2604.
- 23 V. A. Blatov and D. M. Proserpio, *Acta Crystallogr. A Found Crystallogr.*, 2009, **65**, 202.
- 24 V. A. Blatov, A. P. Shevchenko and D. M. Proserpio, *Cryst. Growth Des.*, 2014, **14**, 3576.
- 25 E. V. Alexandrov, V. A. Blatov, A. V. Kochetkov and D. M. Proserpio, *CrystEngComm*, 2011, **13**, 3947.
